1  
2  
3  
4  
5  
6  
7  
8  
9  
10  
11  
12  
13  
14  
15  
16  
17  
18  
19  
20  
21  
22  
23  
24  
25  
26  
27

**The Warburg Effect and lactate signaling augment Fgf signaling to promote sensory-neural development in the otic vesicle.**

Husniye Kantarci, Yunzi Gou and Bruce B. Riley\*  
Biology Department, Texas A&M University

**\*Corresponding author**

**Key words:** Statoacoustic ganglion, sensory epithelium, cranial ganglia, reticulospinal neurons, fgf3, fgf8, erm, pax5, ngn1, atoh1a, ENU mutagenesis, CRISPR/Cas9, whole genome sequencing.

28 **ABSTRACT**

29 Recent studies indicate that many developing tissues modify glycolysis to favor lactate synthesis,  
30 but how this promotes development is unclear. Using forward and reverse genetics in  
31 zebrafish, we show that disrupting the glycolytic gene *phosphoglycerate kinase-1* (*pgkl*) impairs  
32 Fgf-dependent development of hair cells and neurons in the otic vesicle and other neurons in the  
33 CNS/PNS. Focusing on the otic vesicle, we found that Fgf signaling underperforms in *pgkl*<sup>-/-</sup>  
34 mutants even when Fgf is transiently overexpressed. Wild-type embryos treated with drugs that  
35 block synthesis or secretion of lactate mimic the *pgkl*<sup>-/-</sup> phenotype, whereas *pgkl*<sup>-/-</sup> mutants are  
36 rescued by treatment with exogenous lactate. Lactate treatment of wild-type embryos elevates  
37 expression of *Etv5b*/*Erm* even when Fgf signaling is blocked. Thus, by raising steady-state  
38 levels of *Etv5b* (a critical effector of the Fgf pathway), lactate renders cells more responsive to  
39 dynamic changes in Fgf signaling required by many developing tissues.

40

41

42 **INTRODUCTION.**

43 Development of the paired sensory organs of the head relies on critical contributions from cranial  
44 placodes. Of the cranial placodes, the developmental complexity of the otic placode is  
45 especially remarkable for producing the entire inner ear, with its convoluted epithelial labyrinth  
46 and rich cell type diversity. The otic placode initially forms a fluid filled cyst, the otic vesicle,  
47 which subsequently undergoes extensive proliferation and morphogenesis to produce a series of  
48 interconnected chambers containing sensory epithelia (Whitfield, 2015). Sensory epithelia  
49 comprise a salt-and-pepper pattern of sensory hair cells and support cells. Hair cell  
50 specification is initiated by expression of the bHLH factor Atonal Homolog 1 (*Atoh1*)  
51 (Bermingham et al., 1999; Chen et al., 2002; Millimaki et al., 2007; Raft et al., 2007; Woods et  
52 al., 2004). *Atoh1* subsequently activates expression of Notch ligands that mediate specification  
53 of support cells via lateral inhibition. Hair cells are innervated by neurons of the statoacoustic  
54 ganglion (SAG), progenitors of which also originate from the otic vesicle. Specification of

55 SAG neuroblasts is initiated by localized expression of the bHLH factor Neurogenin1 (Ngn1)  
56 (Andermann et al., 2002; Korzh et al., 1998; Ma et al., 1998; Raft et al., 2007). A subset of  
57 SAG neuroblasts delaminate from the otic vesicle to form “transit-amplifying” progenitors that  
58 slowly cycle as they migrate to a position between the otic vesicle and hindbrain before  
59 completing differentiation and extending processes to hair cells and central targets in the brain  
60 (Alsina et al., 2004; Kantarci et al., 2016; Vemaraju et al., 2012).

61 Development of both neurogenic and sensory domains of the inner ear requires dynamic  
62 regulation of Fgf signaling. Fgf-dependent induction of Ngn1 establishes the neurogenic  
63 domain during placodal stages, marking one of the earliest molecular asymmetries in the otic  
64 placode in chick and mouse embryos (Abello et al., 2010; Alsina et al., 2004; Magarinos et al.,  
65 2010; Mansour et al., 1993; Pirvola et al., 2000). Subsequently, as neurogenesis subsides, Fgf  
66 also specifies sensory domains of Atoh1 expression (Hayashi et al., 2008; Ono et al., 2014;  
67 Pirvola et al., 2002). Moreover, in the mammalian cochlea different Fgf ligand-receptor  
68 combinations fine-tune the balance of hair cells and support cells (Hayashi et al., 2007; Jacques  
69 et al., 2007; Mansour et al., 2009; Pirvola et al., 2000; Puligilla et al., 2007; Shim et al., 2005).  
70 In zebrafish, sensory domains form precociously during the earliest stages of otic induction in  
71 response to Fgf from the hindbrain and subjacent mesoderm (Gou et al., 2018; Millimaki et al.,  
72 2007). Ongoing Fgf later specifies the neurogenic domain in an abutting domain of the otic  
73 vesicle (Kantarci et al., 2015; Vemaraju et al., 2012). As otic development proceeds, the  
74 overall level of Fgf signaling increases, reflected by increasing expression of numerous genes in  
75 the Fgf synexpression group, including transcriptional effectors Etv4 (Pea3) and Etv5b (Erm),  
76 and the feedback inhibitor Spry (Sprouty1, 2 and 4). Sensory epithelia gradually expand during  
77 development and express Fgf, contributing to the general rise in Fgf signaling. Similarly,  
78 mature SAG neurons express Fgf5. As more neurons accumulate, rising levels of Fgf  
79 eventually exceed an upper threshold to terminate further specification of neuroblasts and delay  
80 differentiation of transit-amplifying SAG progenitors (Vemaraju et al., 2012). Additionally,  
81 elevated Fgf inhibits further hair cell specification while maintaining support cells in a quiescent

82 state (Bermingham-McDonogh et al., 2001; Jiang et al., 2014; Ku et al., 2014; Maier and  
83 Whitfield, 2014). Thus, dynamic changes in Fgf signaling regulate the onset, amount, and pace  
84 of neural and sensory development in the inner ear.

85 There is increasing evidence that dynamic regulation of glycolytic metabolism is critical for  
86 proper development of various tissues. For example, populations of proliferating stem cells or  
87 progenitors, including human embryonic stem cells, neural stem cells, hematopoietic stem cells,  
88 and posterior presomitic mesoderm, modify glycolysis by shunting pyruvate away from  
89 mitochondrial respiration in favor of lactate synthesis, despite an abundance of free oxygen  
90 (Agathocleous et al., 2012; Bulusu et al., 2017; Gu et al., 2016; Oginuma et al., 2017; Sá et al.,  
91 2017; Wang et al., 2014; Zheng et al., 2016). This is similar to “aerobic glycolysis” (also  
92 known as the “Warburg Effect”) exhibited by metastatic tumors, thought to be an adaptation for  
93 accelerating ATP synthesis while simultaneously producing carbon chains needed for rapid  
94 biosynthesis (Liberti and Locasale, 2016). In addition, aerobic glycolysis and lactate synthesis  
95 appears to facilitate cell signaling required for normal development. For example, aerobic  
96 glycolysis promotes relevant cell signaling to stimulate differentiation of osteoblasts, myocardial  
97 cells, and fast twitch muscle (Esen et al., 2013; Menendez-Montes et al., 2016; Özbudak et al.,  
98 2010; Tixier et al., 2013), as well as maintenance of cone cells in the retina (Ait-Ali et al., 2015).

99 In a screen to identify novel regulators of SAG development in zebrafish, we recovered two  
100 independent mutations that disrupt the glycolytic enzyme Phosphoglycerate Kinase 1 (Pgk1).  
101 Loss of Pgk1 causes a delay in upregulation of Fgf signaling in the otic vesicle, causing a  
102 deficiency in early neural and sensory development. We show that Pgk1 is co-expressed with  
103 Fgf ligands in the otic vesicle, as well as in various clusters of neurons in cranial ganglia and the  
104 neural tube. Moreover, Pgk1 acts non-autonomously to promote Fgf signaling at a distance by  
105 promoting synthesis and secretion of lactate. Lactate independently activates the MAPK  
106 pathway, leading to elevated expression of the effector Etv5b, priming the pathway to render  
107 cells more responsive to dynamic changes in Fgf levels.

108

109 **RESULTS**

110 **Initial characterization of *sagd1***

111 To identify novel genes required for SAG development, we conducted an ENU mutagenesis  
112 screen for mutations that specifically alter the number or distribution of post-mitotic *isl2b:Gfp*+  
113 SAG neurons. A recessive lethal mutation termed *sagd1* (*SAG deficient1*) was recovered based  
114 on a deficiency in the anterior/vestibular portion of ganglion, which are the first SAG neurons to  
115 form. Quantification of *isl2b:Gfp*+ cells in serial sections of *sagd1*<sup>-/-</sup> mutants revealed a ~60%  
116 deficiency in anterior/vestibular SAG neurons at 24 and 30 hpf (Fig. 1A-C). The number of  
117 vestibular neurons remained lower than normal through at least 48 hpf whereas accumulation of  
118 posterior/auditory SAG neurons appeared normal (Fig. 1B). Staining with anti-Isl1/2 antibody,  
119 which labels a more mature subset of SAG neurons, showed a similar trend: There was a 60%  
120 deficiency in anterior/vestibular neurons from the earliest stages of SAG development whereas  
121 subsequent formation of posterior/auditory neurons was normal (Fig. S1A-I). Of note, the early  
122 deficit of SAG neurons did not result from increased apoptosis (Fig. S1J), and in fact *sagd1*<sup>-/-</sup>  
123 mutants produced fewer apoptotic cells than normal. *sagd1*<sup>-/-</sup> mutants show no overt defects in  
124 gross morphology, although *sagd1*<sup>-/-</sup> mutants do show deficits in balance and motor  
125 coordination indicative of vestibular dysfunction. Mutants typically die by 10-12 dpf.

126

127

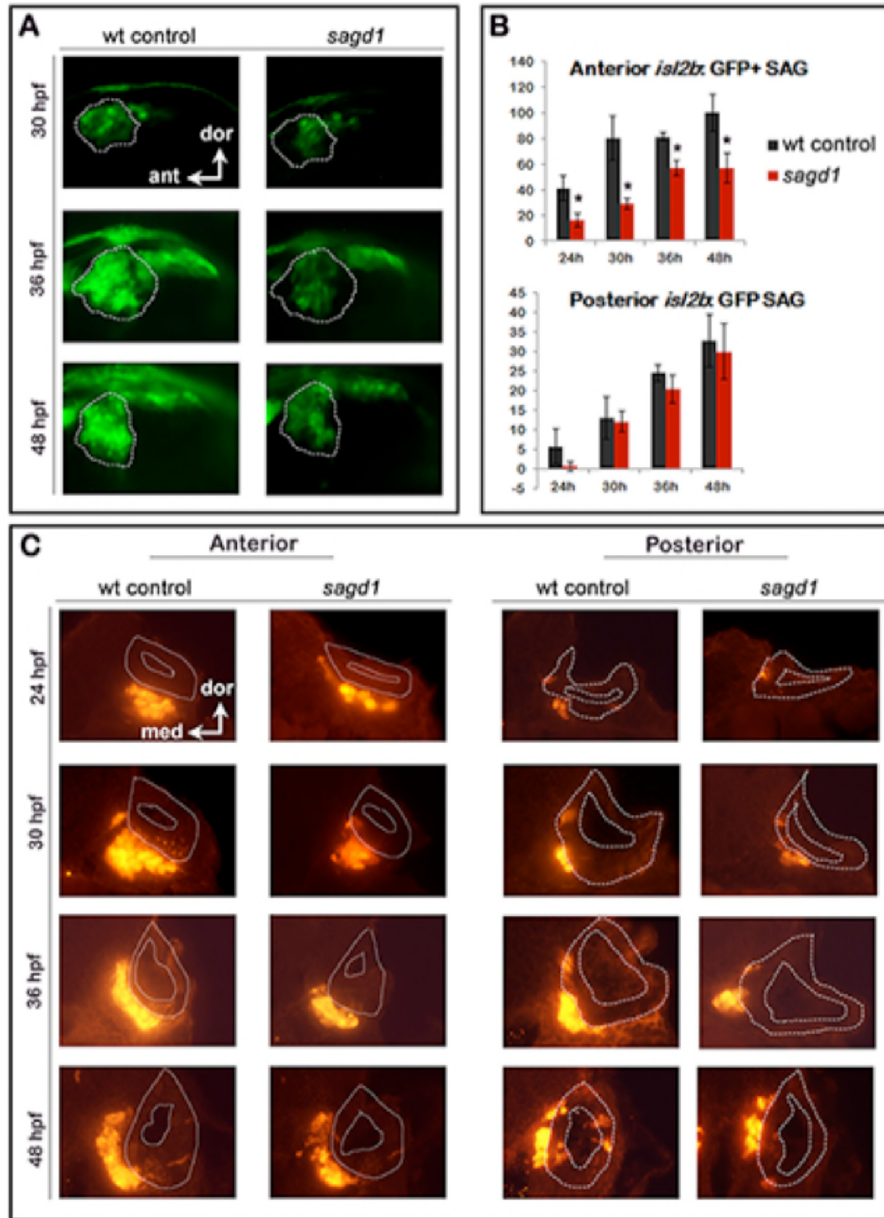

128  
 129 **Figure 1. Initial screen to identify *sagd1*.** (A) Lateral views of *isl2b:Gfp+ SAG* neurons in live  
 130 wild-type (wt) embryos and *sagd1* mutants at the indicated times. The vestibular portion of the  
 131 SAG (outlined in white) is deficient in *sagd1* mutants, as detected in the screen. (B) Number  
 132 (mean and standard deviation) of *isl2b:Gfp+ anterior/*vestibular neurons and posterior/auditory  
 133 neurons in wild-type and *sagd1* embryos at 30 hpf. Asterisks, here and in subsequent figures,  
 134 indicate significant differences ( $p < .05$ ) from wild-type controls. (C) Cross sections through  
 135 anterior and posterior portions of the otic vesicle (outlined in white) showing anti-Gfp stained SAG  
 136 neurons at the indicated times.

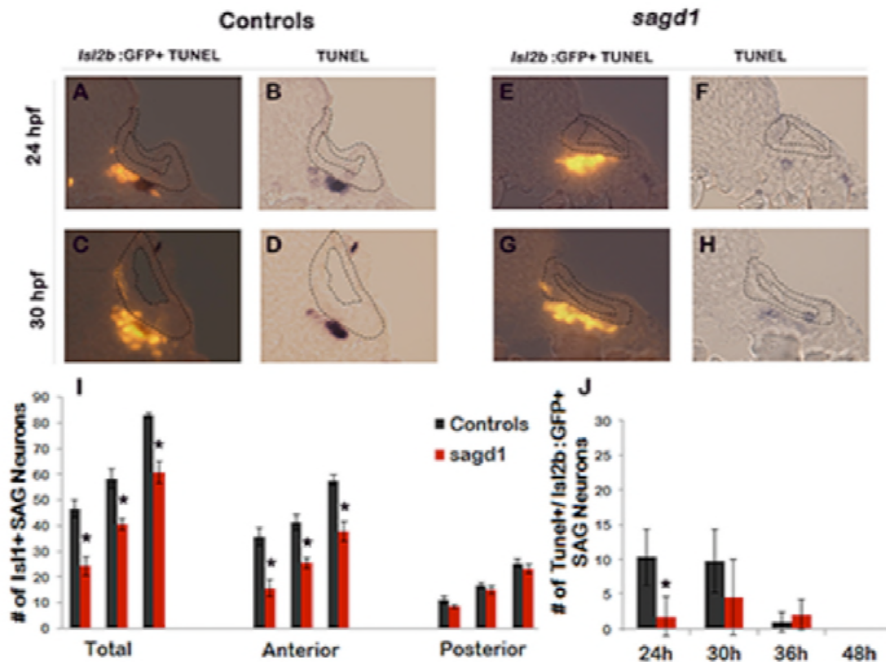

137

138

139

140

141

142

143

144

145

146

147

148

149

150

151

152

153

154

155

156

**Figure S1. Quantitation of mature Isl1/2+ SAG neurons and TUNEL in *sagd1* mutants.** (A-H) Cross sections (dorsal up, medial to the right) through the anterior/ventricular portion of the otic vesicle in control embryos (A-D) and *sagd1* mutants (E-H) showing anti-Isl1/2 stained SAG neurons (A,C, E, G) and co-staining for TUNEL (B, D, F, H). (I) Number of Isl1/2+ SAG neurons at 30 hpf counted from whole mount preparations. Anterior/ventricular SAG neurons are under-produced in *sagd1* mutants, whereas posterior/auditory neurons develop normally. (J) Number of TUNEL+ apoptotic cells at the indicated times. *sagd1* mutants show fewer apoptotic cells than normal at 24 and 30 hpf, indicating that the deficiency in vestibular SAG neurons is not due to cell death.

To further characterize the *sagd1*<sup>-/-</sup> phenotype, we examined earlier stages of SAG development. Specification of SAG neuroblasts is marked by expression of *ngn1* in the floor of the otic vesicle, a process that normally begins at 16 hpf, peaks at 24 hpf, and then gradually declines and ceases by 42 hpf (Vemaraju et al., 2012). We observed that early stages of neuroblast specification were significantly impaired in *sagd1*<sup>-/-</sup> mutants, with only 30% of the normal number of *ngn1*<sup>+</sup> neuroblasts at 24 hpf (Fig. 2A, B, E). However, subsequent stages of specification gradually improved in *sagd1*<sup>-/-</sup> mutants, such that the number of *ngn1*<sup>+</sup> neuroblasts in the otic vesicle was normal by 30 hpf (Fig. 2C, D, E). In the next stage of SAG development, a subset of SAG neuroblasts delaminates from the otic vesicle and enters a transit-amplifying phase. Recently delaminated neuroblasts continue to express *ngn1* for a

157 short time before shifting to expression of *neurod*, which is then maintained until SAG  
 158 progenitors mature into post-mitotic neurons. In *sagd1*<sup>-/-</sup> mutants, the number of *ngn1*<sup>+</sup>  
 159 neuroblasts outside the otic vesicle was reduced by 50-60% at every stage examined (Fig. 2F).  
 160 Similarly, the number of *neurod*<sup>+</sup> transit-amplifying cells was strongly reduced in *sagd1*<sup>-/-</sup>  
 161 mutants (Fig. 2G-O). This deficit was more pronounced at 30 hpf (~60% decrease) than at 48  
 162 hpf (~20% decrease). Moreover, deficit was restricted to anterior transit-amplifying cells that  
 163 give rise to vestibular neurons, whereas accumulation of posterior/auditory progenitors was  
 164 normal (Fig. 2O). In summary, the neural deficit observed in *sagd1*<sup>-/-</sup> mutants reflects a  
 165 deficiency in early specification of vestibular neuroblasts. In addition, the continuing deficit in  
 166 anterior transit-amplifying cells at later stages likely contributes to a long-term deficit in  
 167 vestibular neurons.

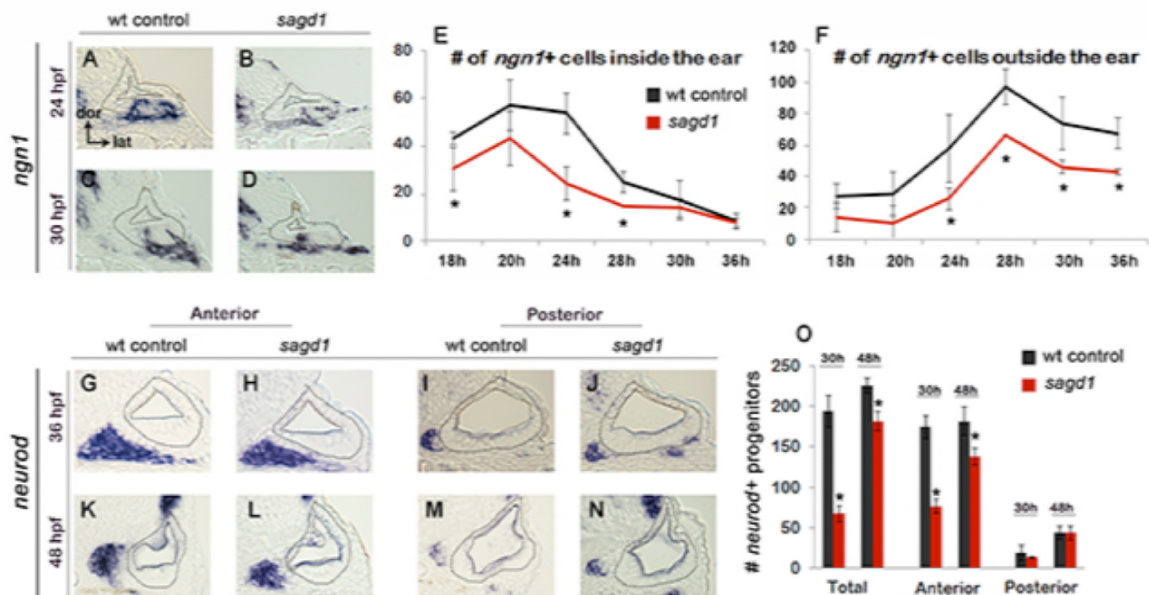

168 **Figure 2. Early development of SAG neurons is impaired in *sagd1* mutants.** (A-D) Cross-sections  
 169 through the anterior/vestibular portion of the otic vesicle (outlined) showing expression of *ngn1* in  
 170 wild-type embryos and *sagd1* mutants at 24 and 30 hpf. (E, F) Mean and standard deviation of  
 171 *ngn1*<sup>+</sup> cells in the floor of the otic vesicle (E) and in recently delaminated SAG neuroblasts outside  
 172 the otic vesicle (F), as counted from serial sections. (G-N) Cross-sections through the  
 173 anterior/vestibular and posterior/auditory regions of the otic vesicle showing expression of *neurod* in  
 174 transit-amplifying SAG neuroblasts at 36 and 48 hpf. (O) Mean and standard deviation of *neurod*<sup>+</sup>  
 175 SAG neuroblasts at 30 and 48 hpf counted from serial sections.  
 176



177 We next examined other aspects of otic development in *sagdl*<sup>-/-</sup> mutants. Expression of  
178 prosensory marker *atoh1a* was reduced in both anterior (utricle) and posterior (sacculus)  
179 maculae at 24 and 30 hpf (Fig. 3A-B'). In agreement, *sagdl*<sup>-/-</sup> mutants produced roughly half  
180 the normal number of hair cells in the utricle and saccule at 36 and 48 hpf (Fig. 3C-E). Because  
181 development of SAG progenitors and sensory epithelia both rely on Fgf signaling, we also  
182 examined expression of various Fgf ligands and downstream Fgf-target genes. Expression of  
183 *fgf3* and *fgf8* appeared relatively normal in *sagdl*<sup>-/-</sup> mutants from 18-30 hpf (Fig. 3S-T', and  
184 data not shown). However, expression of downstream Fgf-targets *etv5b*, *pax5* and *sprouty4*  
185 were severely deficient in the otic vesicle of *sagdl*<sup>-/-</sup> mutants at 18 hpf (Fig. 3F-H').  
186 Expression of these genes partially recovered by 21 hpf and was only mildly reduced by 24 hpf  
187 (Fig. 3I-N'). Despite these changes, markers of axial identity were largely unaffected at 30 hpf,  
188 including the dorsal marker *dlx3b*, the ventrolateral marker *otx1b*, the anteromedial marker *pax5*  
189 and posteromedial marker *pou3f3b* (Fig. 3O-R'). These data suggest that Fgf signaling is  
190 impaired during early stages of otic vesicle development but slowly improves during later stages,  
191 which could explain the early deficits in sensory and neural specification.

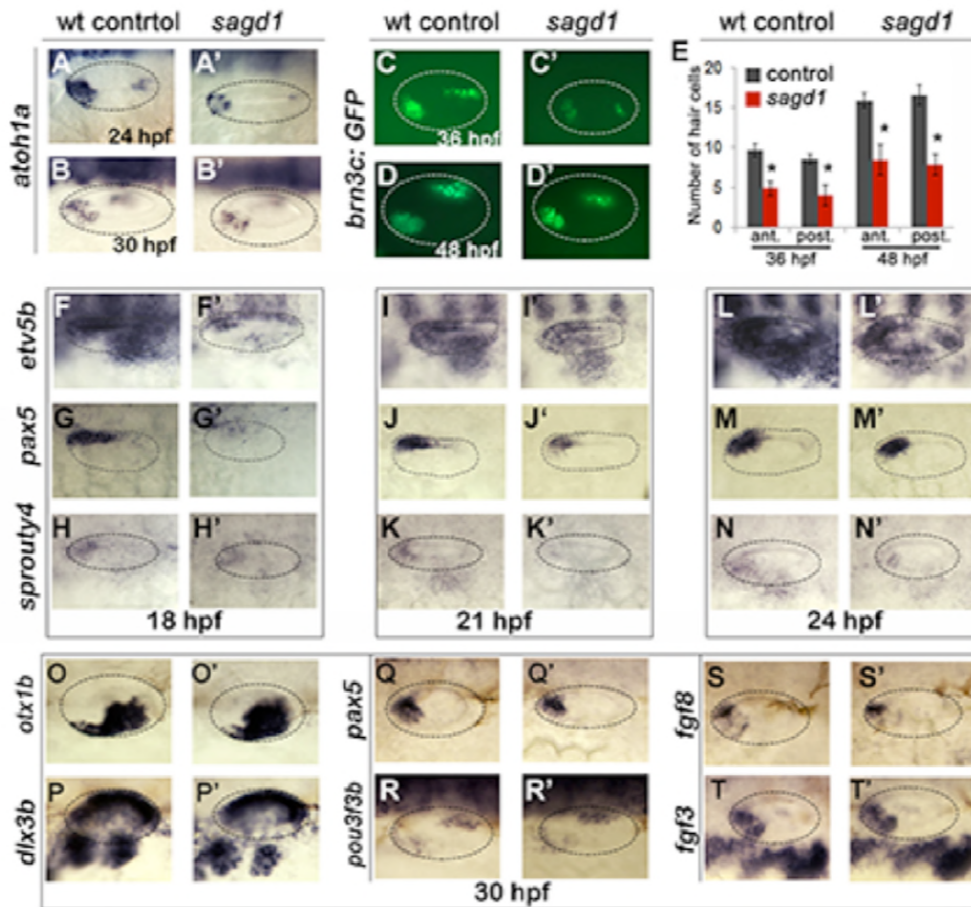

192  
 193 **Figure 3. Sensory development and early Fgf signaling are impaired in *sagd1* mutants.** (A-D'',  
 194 F-T'') Dorsolateral views of whole mount specimens (anterior to the left) showing expression of the  
 195 indicated genes in the otic vesicle (outlined) at the indicated times in wild-type embryos and *sagd1*  
 196 mutants. (E) Mean and standard deviation of hair cells in the anterior/utricle and  
 197 posterior/auditory maculae at 36 and 48 hpf in wild-type embryos (black) and *sagd1* mutants (red).  
 198

### 199 Identification of the *sagd1* locus: A novel role for Pkg1

200 To identify the affected locus in *sagd1*<sup>-/-</sup> mutants, we used whole genome sequencing and  
 201 homozygosity mapping approaches (Obholzer et al., 2012). We identified as our top candidate  
 202 a novel transcript associated with the gene encoding the glycolytic enzyme Phosphoglycerate  
 203 Kinase-1 (Pkg1). The zebrafish genome harbors only one *pkg1* gene, but the locus produces 2  
 204 distinct transcripts (Fig. 4A). The primary transcript (*pkg1-FL*) encodes full-length Pkg1, which  
 205 is highly conserved amongst vertebrates (nearly 90% identical between zebrafish and human).  
 206 However, the second *pkg1* transcript, termed *pkg1-alt*, is unique to zebrafish and arises from an

207 independent transcription start site in the first intron of *pgkl-FL*. There are two short exons  
208 (termed exons 1a and 1b) at the start of *pgkl-alt* that encode a novel peptide with 30 amino  
209 acids. *pgkl-alt* then splices in-frame with exons 2-6, which are identical to *pgkl-FL*, followed  
210 by a splice into a novel exon (termed exon 6a) containing a stop codon (Fig. 4A). Thus  
211 *pgkl-alt* encodes a truncated protein that includes much of the N-terminal half of Pgk1 but  
212 presumably lacks glycolytic enzyme activity. In *sagd1*<sup>-/-</sup> mutants, *pgkl-alt* contains two  
213 nucleotide substitutions leading to loss of a splice acceptor site as well as the translation start  
214 codon in exon 1b (Fig. 4B). Either of these SNPs is predicted to disrupt expression of *pgkl-alt*  
215 protein.

216 Although *sagd1* does not alter the sequence of *pgkl-FL*, we tested whether the *sagd1*  
217 mutation alters accumulation of *pgkl-FL* transcript. In wild-type embryos *pgkl-FL* is widely  
218 expressed at a low level, but beginning around 18 hpf transcript abundance becomes dramatically  
219 elevated in clusters of cells scattered throughout the central and peripheral nervous systems.  
220 Examples of cells with elevated *pgkl* expression include utricular and saccular hair cells, mature  
221 SAG neurons (Fig. 4D-G), trigeminal and facial ganglia, the midbrain-hindbrain border, and  
222 reticulospinal neurons in the hindbrain (Fig. 4I, K, S). A similar pattern is observed for  
223 accumulation of *pgkl-alt* transcript (Fig. 4M-R). Local upregulation of *pgkl-FL* transcript is  
224 severely attenuated in *sagd1*<sup>-/-</sup> mutants (Fig. 4H, J, L). To test whether Pgk1-alt function is  
225 sufficient to upregulate *pgkl-FL*, we examined the effects of transient misexpression using a heat  
226 shock-inducible transgene, *hs:pgkl-alt*. When *hs:pgkl-alt* was activated at 20 hpf,  
227 accumulation of *pgkl-FL* was strongly elevated at 24 hpf (Fig. 4U, V). This was in contrast to  
228 accumulation of transgenic *pgkl-alt* transcript, which peaked near the end of the heat shock  
229 period at 21 hpf (not shown) but then decayed to background levels by 24 hpf (Fig. 4W, X).  
230 We infer that perdurance of Pgk1-alt protein is sufficient to upregulate *pgkl-FL*. Based on  
231 previous studies of yeast and mammalian Pgk1 (Beckmann et al., 2015; Ho et al., 2010; Liao et  
232 al., 2016; Ruiz-Echevarria et al., 2001; Shetty et al., 2010; Shetty et al., 2004), we speculate that  
233 Pgk1-alt acts to stabilize *pgkl-FL* transcript (See Discussion).

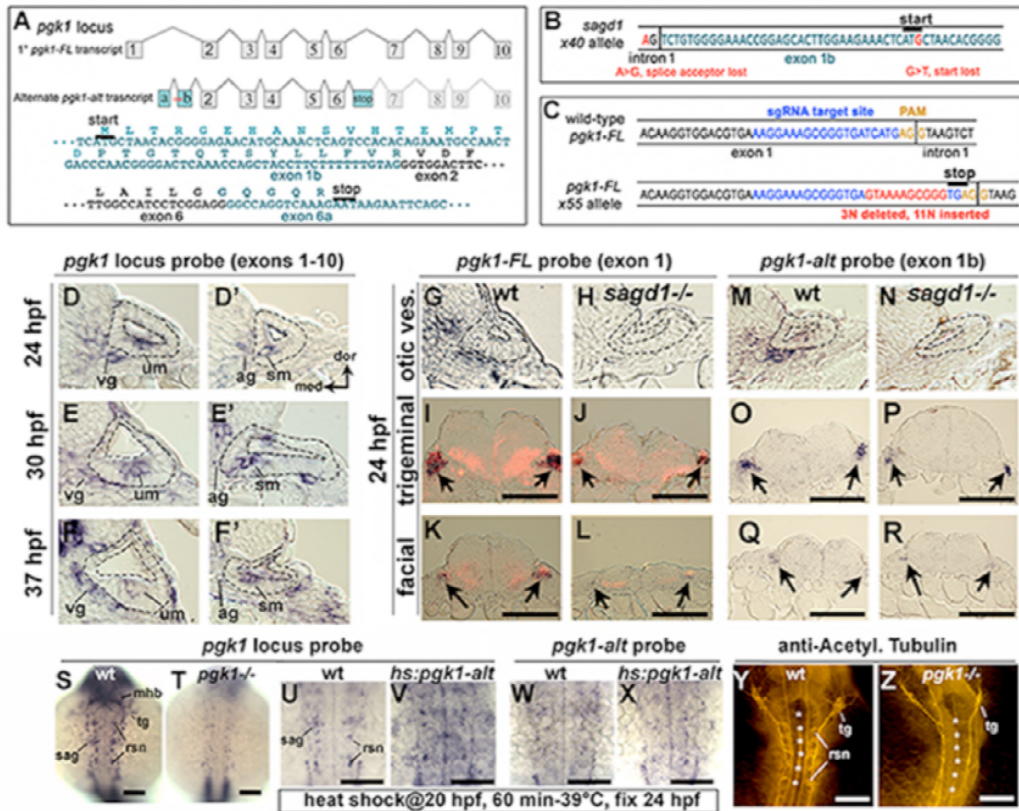

234  
235  
236  
237  
238  
239  
240  
241  
242  
243  
244  
245  
246  
247  
248  
249  
250  
251  
252  
253  
254

**Figure 4. Two independent transcripts associated with the *pgk1* locus.** (A) Exon-intron structure of the primary full-length *pgk1* transcript (*pgk1-FL*); and alternate transcript (*pgk1-alt*) arising from an independent transcription start site containing two novel exons (1a and 1b) that splice in-frame to exon 2, and a third novel exon (6a) containing to a stop codon. The nucleotide and peptide sequences of exons 1b and 6a are shown. Relative positions of the lesions in *sagd1* are indicated (red asterisks). (B) Nucleotide sequence near the 5' end of exon 1b showing the SNPs detected in *sagd1* (red font). (C) Nucleotide sequence of *pgk1-FL* showing the sgRNA target site (blue font) and the altered sequence of the *x55* mutant allele (red font), which introduces a premature stop codon. (D-F') Cross sections through the otic vesicle (outlined) showing staining with ribo-probe for the entire *pgk1* locus (covering both *pgk1-FL* and *pgk1-alt*) in wild-type embryos. Note elevated expression in the vestibular ganglion (vg), auditory ganglion (ag), utricular macula (um), and saccular macula (sm). (G, H, M, N) Cross sections through the otic vesicle (outlined) in wild-type embryos and *sagd1* mutants stained with ribo-probe for exon 1 (*pgk1-FL* alone) (G, H) or exon 1b (*pgk1-alt* alone) (M, N). Accumulation of both transcripts is dramatically reduced in *sagd1* mutants. (I-L, O-R) Cross-sections through the hindbrain (dorsal up) showing expression of *pgk1-FL* (black) plus *neurod* (red) (I-L) or *pgk1-alt* alone (O-R). Arrows indicate positions of the trigeminal and facial ganglia. (S-Z) Whole mount staining of the hindbrain (dorsal view, anterior up) showing expression of the *pgk1* locus (S-V), *pgk1-alt* alone (W, X), or staining with anti-acetylated tubulin (Y-Z) in embryos with the indicated genotypes. Positions of the midbrain-hindbrain border (mhb), reticulospinal neurons (rsn), trigeminal ganglion (tg), SAG, and rhombomere centers (white asterisks) are indicated. Embryos in (U-X) were heat shocked at 20 hpf and fixed at 24 hpf. Scale bar, 100  $\mu$ m.

255 To directly test the requirement for full length P<sub>gk1</sub>, we targeted the first exon of *pgkl-FL*  
256 using CRISPR-Cas9 and recovered an indel mutation leading to a frameshift followed by a  
257 premature stop (Fig. 4C). This presumptive null mutation is predicted to eliminate all but the  
258 first 19 amino acids of P<sub>gk1</sub>. Expression of *pgkl* is severely reduced in *pgkl*<sup>-/-</sup> mutants,  
259 presumably reflecting nonsense-mediated decay (Fig. 4T). The phenotype of *pgkl*<sup>-/-</sup> mutants is  
260 identical to *sagd1*<sup>-/-</sup>, including reduced otic expression of *etv5b* at 18 hpf, reduced *ngn1* at 24  
261 hpf, and deficiencies in *neurod*<sup>+</sup> transit-amplifying cells and mature *isl2b-gfp*<sup>+</sup> SAG neurons  
262 (Fig. 5A-H). Additionally, development of the trigeminal ganglion and reticulospinal neurons  
263 in the hindbrain is also impaired (Fig. 4Y, Z). When *pgkl*<sup>+/-</sup> heterozygotes were crossed with  
264 *sagd1*<sup>+/-</sup> heterozygotes, all intercross embryos developed normally (Fig. 5Q), confirming that  
265 *pgkl-alt* and *pgkl-FL* encode distinct complementary functions. We also generated a  
266 heat-shock inducible transgene to overexpress *pgkl-FL* (*hs:pgkl*). Activation of *hs:pgkl* at 18  
267 hpf rescued the SAG deficiency in *sagd1*<sup>-/-</sup> mutants (Fig. 5Q). Together, these data show that  
268 *pgkl-alt* is required to locally upregulate *pgkl-FL*, which in turn is required for proper Fgf  
269 signaling and sensory and neural development.

270

### 271 **P<sub>gk1</sub> acts non-autonomously to promote Fgf signaling**

272 To better understand how P<sub>gk1</sub> promotes Fgf signaling during otic development, we generated  
273 genetic mosaics by transplanting wild-type donor cells into *pgkl*<sup>-/-</sup> mutant host embryos. We  
274 reasoned that if P<sub>gk1</sub> acts cell-autonomously, as expected for a glycolytic enzyme, then isolated  
275 wild-type cells should be able to respond to local Fgf sources within a *pgkl*<sup>-/-</sup> mutant host.  
276 Surprisingly, the majority of the wild-type cells located near the utricular Fgf source in the floor  
277 of the otic vesicle in *pgkl*<sup>-/-</sup> hosts did not express the Fgf-target *etv5b* (Fig. 5J, L, N, P, R). In  
278 control experiments, wild-type cells transplanted into wild-type hosts showed normal expression  
279 of *etv5b* (Fig. 5I, K, M, O, R). Thus, P<sub>gk1</sub> is required non-autonomously to promote Fgf  
280 signaling at a distance.

281

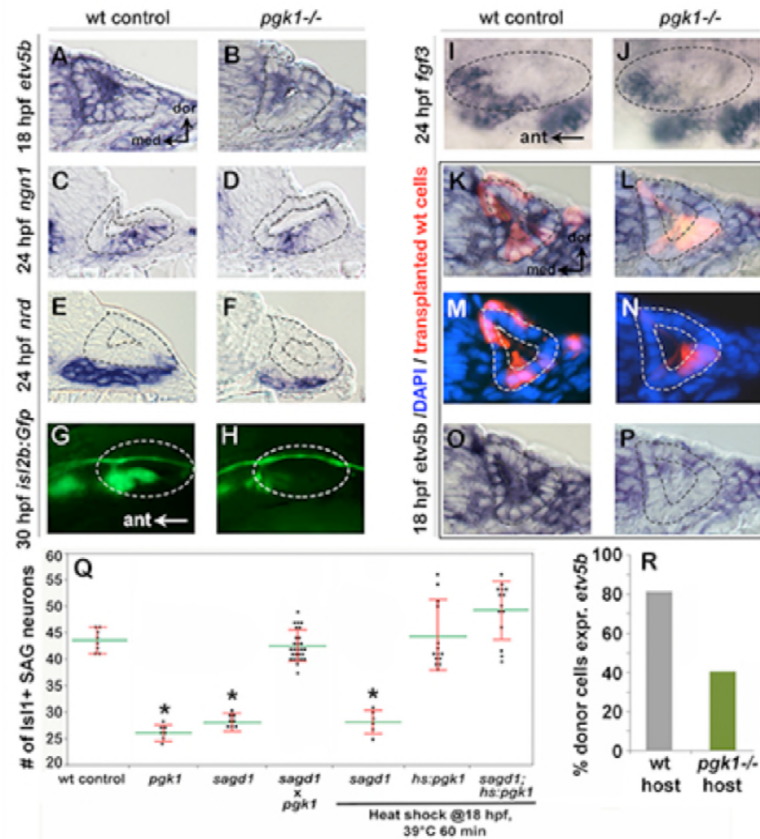

282  
283  
284  
285  
286  
287  
288  
289  
290  
291  
292  
293  
294  
295  
296

**Figure 5. Initial characterization of *pgk1*<sup>-/-</sup> mutants and genetic mosaics.** (A-F) Cross sections through the anterior/vestibular region of the otic vesicle (outlined) showing expression of the indicated genes in wild-type embryos and *pgk1*<sup>-/-</sup> mutants at the indicated times. (G-J) Lateral views showing *Isl1/2b-Gfp* expression in live embryos at 30 hpf (G, H) and *fgf3* at 24 hpf (I, J). The otic vesicle is outlined. (K-P) Cross sections through the otic vesicle (outlined) showing positions of lineage labeled wild-type cells (red dye) transplanted into a wild-type host (K, M, O) or a *pgk1*<sup>-/-</sup> mutant host (L, N, P). Sections are co-stained with DAPI (M, N) and *etv5b* probe (O, P). Note the absence of *etv5b* expression in wild-type cells transplanted into the mutant host (P). (Q) Number of mature *Isl1/2*+ SAG neurons at 30 hpf in embryos with the indicated genotypes, except for *sagd1* x *pgk1* intercross expected to contain roughly 25% each of +/+, *sagd1*+, *pgk1*+ and *sagd1/pgk1* embryos. (R) Percent of wild-type donor cells located in the ventral half of the otic vesicle expressing *etv5b* in wild-type or *pgk1*<sup>-/-</sup> hosts. A total of 151 wild-type donor cells were counted in 8 otic vesicles of wild-type host embryos, and 247 wild-type donor cells were counted in 8 otic vesicles of *pgk1*<sup>-/-</sup> host embryos.

### 297 **Pgk1 does not act extracellularly through Plasmin turnover**

298 We considered two distinct mechanisms for non-autonomous functions of Pgk1 that have been  
299 documented in metastatic tumors. First, tumor cells secrete Pgk1 to promote early stages of  
300 metastasis through modulation of extracellular matrix (ECM) and cell signaling (Chirico, 2011;

301 Jung et al., 2009; Wang et al., 2007; Wang et al., 2010). The only specific molecular function  
302 identified for secreted P<sub>gk1</sub> is to serve as a disulfide reductase leading to proteolytic cleavage of  
303 Plasmin (Lay et al., 2000), a serine protease that cleaves Fgf as well as ECM proteins required  
304 for Fgf signaling (Botta et al., 2012; George et al., 2001; Meddahi et al., 1995; Schmidt et al.,  
305 2005). This raised the possibility that loss of P<sub>gk1</sub> could elevate Plasmin activity and thereby  
306 impair Fgf signaling. To test this, we injected morpholino to block synthesis of Plasminogen  
307 (Plg), the zymogen precursor of Plasmin. However, injection of the *plg* morpholino did not  
308 rescue or ameliorate the neural deficiency in *sagd1*<sup>-/-</sup> or *pgk1*<sup>-/-</sup> mutants (Fig. S2).  
309

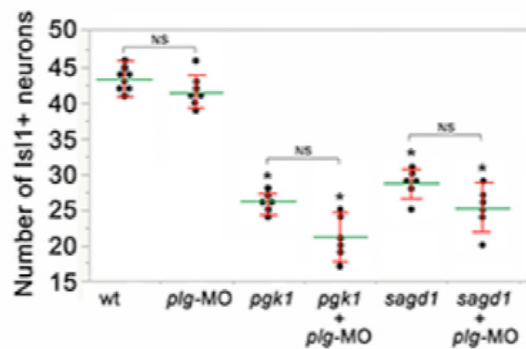

310  
311 **Figure S2. Knockdown of *plasminogen* does not alter *pgk1*<sup>-/-</sup> or *sagd1*<sup>-/-</sup> phenotypes.** Mean  
312 (green) and standard deviation (red) of the number of Isl1/2+ SAG neurons at 30 hpf in embryos  
313 with the indicated genotypes and/or injected with *plg*-MO. NS, no significant difference between  
314 groups indicated in brackets.

315

### 316 **Aerobic glycolysis is required for otic development**

317 The second P<sub>gk1</sub>-dependent mechanism employed by metastatic tumors is to upregulate and  
318 redirect glycolysis to promote lactate synthesis despite abundant oxygen. This process is often  
319 called “aerobic glycolysis”, or the “Warburg effect”, and is thought to accelerate synthesis of  
320 ATP and provide 3-carbon polymers used for rapid biosynthesis (Liberti and Locasale, 2016).  
321 In addition, lactate secretion facilitates cell signaling in cancer cells (San-Millán and Brooks,  
322 2017) as well as during certain normal physiological contexts (Lee et al., 2015; Peng et al., 2016;  
323 Yang et al., 2014; Zuo et al., 2015; Reviewed by Philp et al., 2005). We therefore tested  
324 whether blocking glycolysis and/or lactate synthesis in wild-type embryos could mimic the

325 phenotype of *pgk1*<sup>-/-</sup> and *sagd1*<sup>-/-</sup> mutants. Treating wild-type embryos with 2-deoxy-glucose  
 326 (2DG) (Nirenberg and Hogg, 1958) or 3PO (Clem et al., 2008) to block early steps in glycolysis  
 327 (Fig. 6A) reduced the number of mature SAG neurons to a level similar to that of *pgk1*<sup>-/-</sup> or  
 328 *sagd1*<sup>-/-</sup> mutants (Fig. 6B). Similar results were obtained when these inhibitors were added at 0  
 329 hpf or 14 hpf.

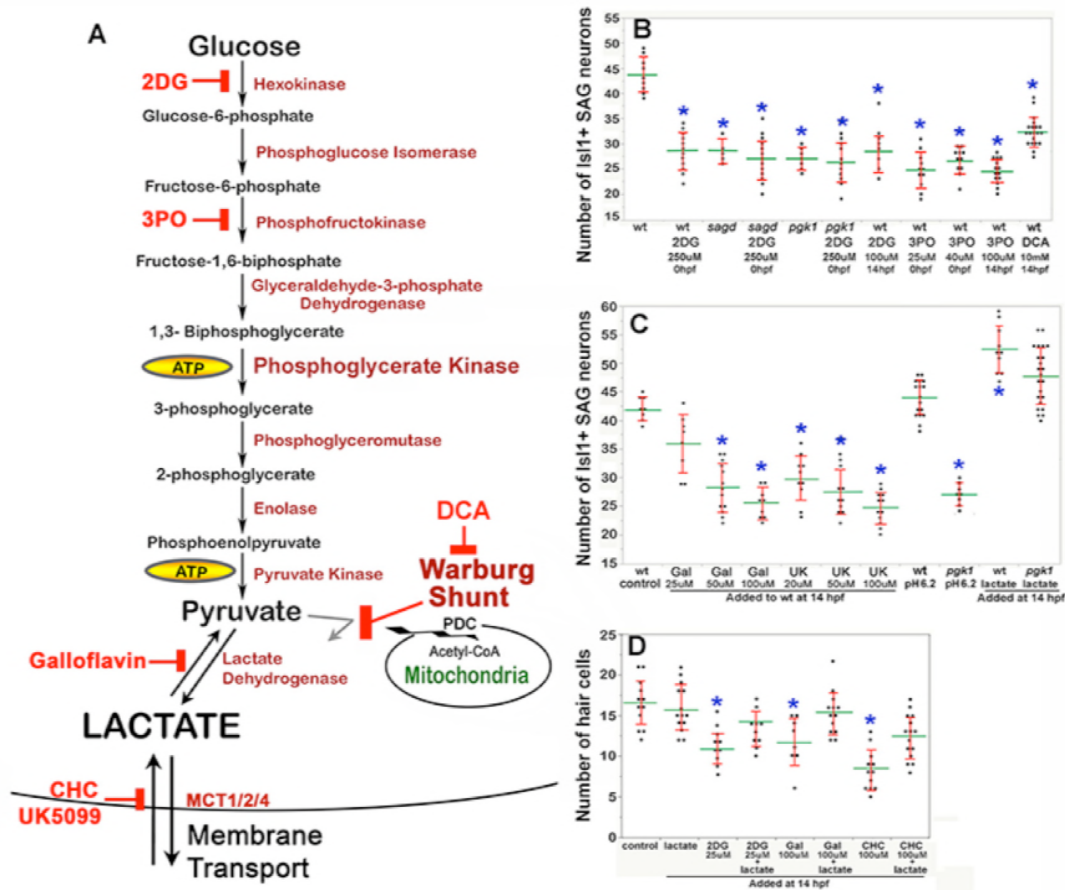

330  
 331

332 **Figure 6. Drugs blocking aerobic glycolysis mimic *pgk1*<sup>-/-</sup> mutants.** (A) Diagram of the glycolytic  
 333 pathway and changes associated with the Warburg Effect in which pyruvate is shunted from mitochondria  
 334 in favor of synthesis and secretion of lactate. The indicated inhibitors were used to block discrete steps  
 335 in the pathway. In the Warburg Shunt, mitochondrial Pyruvate Dehydrogenase Complex (PDC) is  
 336 inhibited by elevated Pyruvate Dehydrogenase Kinase, the activity of which is blocked by DCA. (B, C)  
 337 Scatter plots showing the mean (green) and standard deviation (red) of the number of Is1/2+ SAG  
 338 neurons at 30 hpf in embryos with the indicated genotypes and/or drug treatments. Lactate-treatments  
 339 and some controls were buffered with 10 mM MES at pH 6.2. (D) Scatter plots showing the mean and  
 340 standard deviation of the total number of hair cells at 36 hpf in embryos treated with the indicated drugs.  
 341 Asterisks show significant differences ( $p \leq .05$ ) from wild-type control embryos.



342 We next focused on later steps in the pathway dealing with handling of pyruvate vs. lactate. In  
343 cells exhibiting the Warburg Effect, transport of pyruvate into mitochondria is typically blocked  
344 by upregulation of Pyruvate Dehydrogenase Kinase (PDK) (Cairns et al., 2011), thereby favoring  
345 reduction of pyruvate to lactate (see Warburg Shunt, Fig. 6A). Dichloroacetate (DCA) blocks  
346 PDK activity (Kato et al., 2007), allowing more pyruvate to be transported into mitochondria and  
347 thereby forestalling lactate synthesis. Treating wild-type embryos with DCA at 14 hpf  
348 mimicked the deficiency of SAG neurons seen in *pgkl*<sup>-/-</sup> and *sagd1*<sup>-/-</sup> mutants (Fig. 6B). To  
349 directly block synthesis of lactate from pyruvate, wild-type embryos were treated with  
350 Galloflavin, an inhibitor of Lactate Dehydrogenase (Farabegoli et al., 2012; Manerba et al.,  
351 2012) (Fig. 6A). Wild-type embryos treated with Galloflavin also displayed a deficiency of  
352 SAG neurons similar to *pgkl*<sup>-/-</sup> and *sagd1*<sup>-/-</sup> mutants (Fig. 6C). Finally, to block transport of  
353 lactate across the cell membrane, we treated wild-type embryos with either CHC or UK5099,  
354 which block activity of monocarboxylate transporters MTC1, 2 and 4 (Halestrap, 1975;  
355 Halestrap and Denton, 1974) (Fig. 6A). Application of either CHC or UK5099 also mimicked  
356 the SAG deficiency in *pgkl*<sup>-/-</sup> and *sagd1*<sup>-/-</sup> mutants (Fig. 6C, and data not shown). Treatment  
357 of wild-type embryos with 2DG, Galloflavin or CHC also reduced hair cell production to a level  
358 comparable to *sagd1*<sup>-/-</sup> or *pgkl*<sup>-/-</sup> mutants (Fig. 6D). To further explore the role of lactate, we  
359 added exogenous lactate to embryos beginning at 14 hpf and examined accumulation of SAG  
360 neurons at 30 hpf. As shown in Fig. 6C, lactate treatment elevated SAG accumulation above  
361 normal in wild-type embryos and fully rescued *pgkl*<sup>-/-</sup> mutants. Lactate treatment also rescued  
362 hair cell production in wild-type embryos treated with 2DG, Galloflavin, or CHC (Fig. 6D).  
363 Thus, pharmacological agents that block glycolysis, lactate synthesis or lactate secretion are  
364 sufficient to mimic the *pgkl*<sup>-/-</sup> and *sagd1*<sup>-/-</sup> phenotype, and exogenous lactate is sufficient to  
365 reverse these effects.

366 We next examined whether the above inhibitors and/or exogenous lactate affect Fgf  
367 signaling and SAG specification in the nascent otic vesicle. Treatment of wild-type embryos  
368 with Galloflavin or CHC reduced the number of cells expressing *etv5b* and *ngn1* at 18 hpf and 24

369 hpf, respectively (Fig. 7Ag, Ah, Bg, Bh, E), mimicking the effects of *pgk1*<sup>-/-</sup> (Fig. 7Ab, Bb, C,  
 370 D). Treatment with exogenous lactate reversed the effects of Galloflavin and CHC (Fig. 7Ai,  
 371 Aj, Bj) and rescued *pgk1*<sup>-/-</sup> mutants (Fig. Ac, Bc, C, D). Moreover, treating wild-type embryos  
 372 with lactate increased the number of cells expressing *etv5b* and *ngn1* (Fig. 7Ae, Be, C, D).  
 373

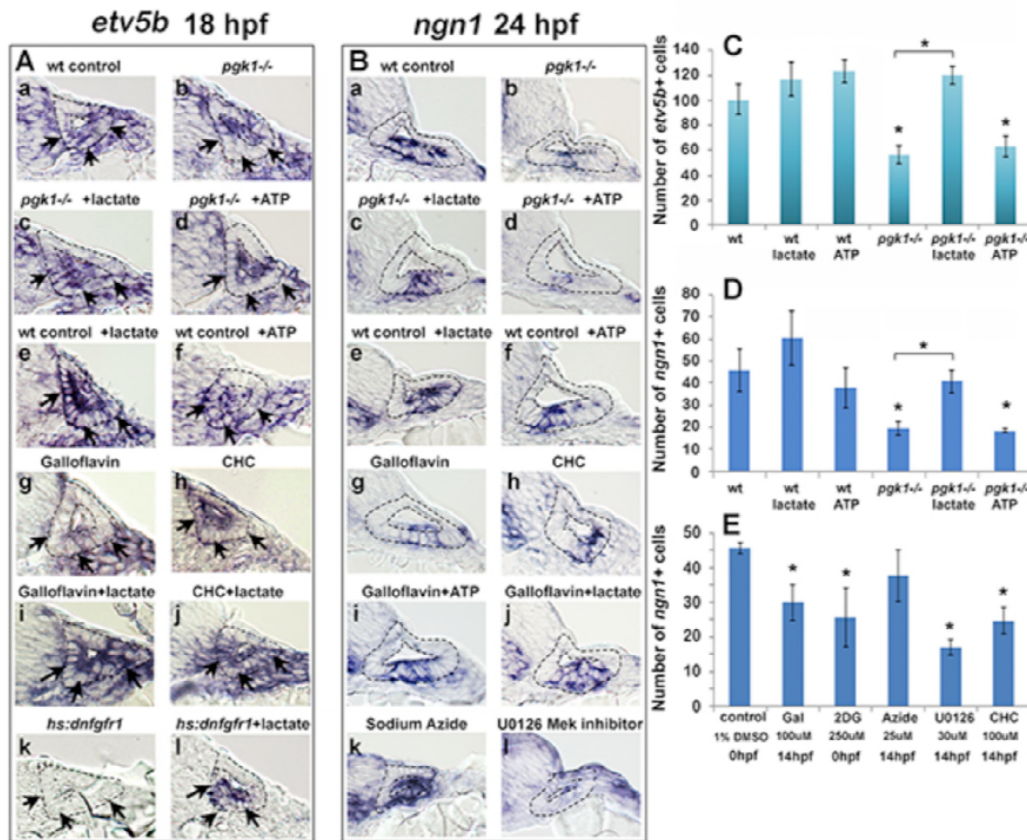

374  
 375  
 376 **Figure 7. Exogenous lactate reverses the effects of disrupting aerobic glycolysis.** (A, B) Cross  
 377 sections through the anterior/vestibular portion of the otic vesicle (outlined) showing expression of  
 378 *etv5b* at 18 hpf (A) and *ngn1* at 24 hpf (B) in embryos with the indicated genotype or drug treatment.  
 379 Arrows in (A) highlight expression in the ventromedial otic epithelium. (C) Mean and standard  
 380 deviation of the number of *etv5b*<sup>+</sup> cells in the ventral half of the otic vesicle counted from serial  
 381 sections of embryos with the indicated genotype or drug treatment. (D, E) Mean and standard  
 382 deviation of the number of *ngn1*<sup>+</sup> cells in the floor of the otic vesicle counted from serial sections of  
 383 embryos with the indicated genotype or drug treatment. Asterisks indicate significant differences ( $p$   
 384  $< .05$ ) from wild-type controls, or between groups indicated by brackets.  
 385

386 We also tested whether a deficiency of ATP contributes to the *pgk1*<sup>-/-</sup> phenotype. Adding  
387 exogenous ATP to *pgk1*<sup>-/-</sup> mutants at 14 hpf did not ameliorate the deficiency in expression of  
388 *etv5b*, *ngn1*, or *pax5* (Fig. 7Ad, Bd, C, D; and Fig. S3). Likewise, adding ATP to wild-type  
389 embryos at 14 hpf did not significantly affect expression of these genes (Fig. 7Af, Bf, C, D; and  
390 Fig. S3). Finally, adding 25  $\mu$ M sodium azide to wild-type embryos at 14 hpf to block  
391 mitochondrial respiration did not significantly impair expression of *ngn1* at 24 hpf (Fig. 7Bk, E).  
392 Thus, lactate is critical for early Fgf signaling and SAG specification, but exogenous ATP does  
393 not affect these functions. Moreover, the deficiencies in otic development observed in *pgk1*<sup>-/-</sup>  
394 mutants can be attributed to disruption of lactate synthesis and secretion.

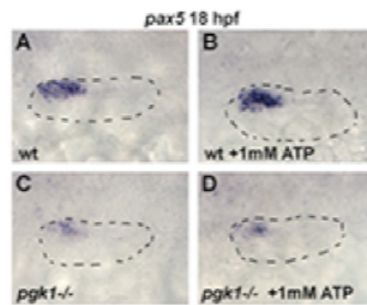

395  
396 **Figure S3. Exogenous ATP does not rescue *pgk1*<sup>-/-</sup> mutants.** Dorsolateral view (anterior to the  
397 left) of the otic vesicle (outlined) showing expression of *etv5b* (A-D) or *pax5* (E-H) at 18 hpf in  
398 wild-type embryos or *pgk1*<sup>-/-</sup> mutants with or without exposure to exogenous 1 mM ATP as  
399 indicated.

400

#### 401 **Lactate and Fgf act in parallel to regulate early otic development**

402 Fgf regulates gene expression primarily through the PI3K and MAPK/Erk signal transduction  
403 pathways, but it is unknown which is most critical for otic development. Treatment of  
404 wild-type embryos with U0126, an inhibitor of the MAPK activator Mek (Hawkins et al., 2008),  
405 reduced the number of *ngn1*<sup>+</sup> cells at 24 hpf (Fig. 7Bl, E) and mature *Isl1*<sup>+</sup> SAG neurons at 30  
406 hpf (Fig. S4) to a degree similar to or greater than *pgk1*<sup>-/-</sup> mutants. In contrast, treatment of  
407 wild-type embryos with the PI3K inhibitor LY294002 (Montero et al., 2003) had negligible  
408 effects on these genes (Fig. S4, and data not shown), showing that most of the effects of Fgf are  
409 mediated by MAPK/Erk.

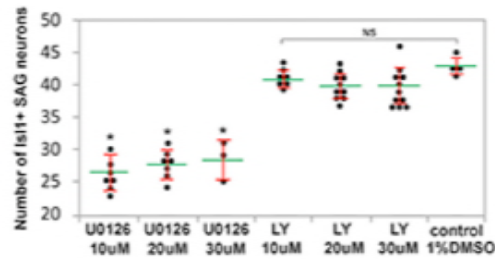

410  
411 **Figure S4. development of SAG neurons requires MAPK/Erk but not PI3K.** Mean (green)  
412 and standard deviation (red) of the number of Isl1/2+ SAG neurons at 30 hpf in embryos treated  
413 with MEK inhibitor U0126 or PI3K inhibitor LY294002 (LY) at the indicated concentrations.  
414 NS, no significant difference from wild-type control.

415  
416 Recent findings show that lactate can activate the MAPK/Erk pathway through an independent  
417 mechanism (Lee et al., 2015, see Discussion), prompting us to investigate whether the ability of  
418 lactate to activate Fgf-target genes requires Fgf signaling. Misexpression of dominant negative  
419 Fgf receptor from a heat shock-inducible transgene, *hs:dnfgfr1*, fully suppressed *etv5b*  
420 expression within two hours of heat shock (Fig. 7Ak; Fig. 8C). Importantly, treatment with  
421 exogenous lactate partially restored *etv5b* expression when Fgf signaling was blocked (Fig. 7Al;  
422 Fig. 8D). Because developmental defects in *pgkl*<sup>-/-</sup> and *sagd1*<sup>-/-</sup> mutants appear to stem from  
423 reduced Fgf signaling, we tested whether elevating Fgf can rescue *pgkl*<sup>-/-</sup> mutants. Activation  
424 of *hs:fgf8* at a moderate level (37°C for 30 minutes) beginning at 16 hpf increased the level of  
425 *pax5* expression in the otic vesicle at 18 hpf and expanded the spatial domain (Fig. 8E, G).  
426 Activation of *hs:fgf8* in *pgkl*<sup>-/-</sup> mutants increased expression of *pax5* relative to *pgkl*<sup>-/-</sup> alone  
427 (Fig. 8F, H), but not to the same degree seen in non-mutant embryos. Thus, elevating either Fgf  
428 or lactate alone can partially compensate for loss of the other, but full activation of early otic  
429 genes requires both Fgf and lactate.

430

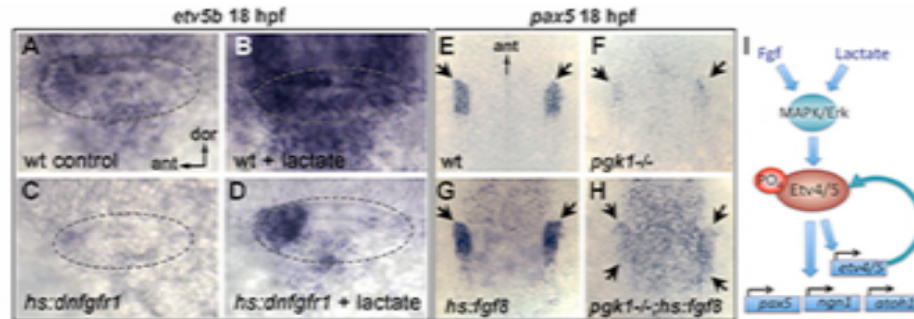

431  
432 **Figure 8. Fgf and lactate are required together for full activation of early otic genes.** (A-D)  
433 Dorsolateral view of the otic vesicle (outlined) showing expression of *etv5b* at 18 hpf in wild-type  
434 embryos or *hs:dnfgfr1*/+ transgenic embryos with or without exogenous 6.7 mM lactate added at  
435 14 hpf, as indicated. Embryos were heat shocked at 39°C for 30 minutes beginning at 16 hpf.  
436 (E-H) Dorsal view (anterior to the top) of the hindbrain and otic region showing expression of the  
437 otic domain of *pax5* (black arrows) in embryos with the indicated genotypes. Embryos were heat  
438 shocked at 37°C for 30 minutes beginning at 16 hpf. (I) A model for how lactate and Fgf  
439 signaling converge on MAPK/Erk to increase the pool of phosphorylated activated Etv4/5,  
440 enabling cells to respond more quickly and robustly to dynamic changes in Fgf.

441

442

## 443 DISCUSSION

### 444 Enhanced glycolysis and lactate secretion promote Fgf signaling

445 Metabolic pathways such as glycolysis have traditionally been viewed as “house keeping”  
446 functions but are increasingly recognized for their specific roles in development. We  
447 discovered that mutations in *pgk1* cause specific defects in formation of hair cells and SAG  
448 neurons of the inner ear, as well as various cranial ganglia and reticulospinal neurons of the  
449 hindbrain, all of which normally show elevated expression of *pgk1* (Fig. 4) and require Fgf  
450 signaling (Lassiter et al., 2009; Maulding et al., 2014; Millimaki et al., 2007; Nechiporuk et al.,  
451 2005; Terriente et al., 2012; Vemaraju et al., 2012). Treatment of wild-type embryos with  
452 specific inhibitors of glycolysis or lactate synthesis or secretion mimicked the effects of *pgk1*<sup>-/-</sup>,  
453 indicating that the affected cell types require “aerobic glycolysis”, similar to the Warburg Effect  
454 exhibited by metastatic tumors. Developmental deficiencies seen in *pgk1*<sup>-/-</sup> mutants reflect  
455 weakened response to Fgf but are fully rescued by treatment with exogenous lactate. Lactate  
456 has been shown to bind and stabilize the cytosolic protein Ndr3, which in turn activates Raf

457 (Lee et al., 2015) thereby converging with Fgf signaling to activate MAPK/Erk. The  
458 MAPK/Erk pathway activates transcription of *etv4* and *etv5a/b* genes (Raible and Brand, 2001;  
459 Roehl and Nüsslein-Volhard, 2001). Etv4/5 proteins are also phosphorylated and activated by  
460 MAPK/Erk and mediate many of the downstream effects of Fgf (Brown et al., 1998; O'Hagan et  
461 al., 1996; Znosko et al., 2010). This dual regulation of Etv4/5 implies a feedback amplification  
462 step and offers an explanation for why lactate is required to increase the efficiency of early  
463 stages of Fgf signaling (Fig. 8I). Specifically, initial activation of MAPK/Erk by lactate would  
464 expand the pool of Etv4/5, priming cells to respond more quickly to dynamic changes in Fgf  
465 signaling. Without *pgk1*, the initial response to Fgf is sluggish and causes lasting deficits in  
466 vestibular neurons. Later, as Fgf-mediated feedback amplification continues in *pgk1*<sup>-/-</sup>, Fgf  
467 signaling gradually improves on its own and is sufficient to support normal development of  
468 auditory neurons.

469 It is interesting that sites of *pgk1* upregulation correlate with sites of Fgf ligand expression.  
470 Fgf expression does not require *pgk1* (Fig. 3S, T), and *pgk1* upregulation does not require Fgf  
471 (not shown), suggesting co-regulation by shared upstream factor(s). Analysis of genetic  
472 mosaics showed that isolated wild-type cells transplanted into *pgk1*<sup>-/-</sup> host embryos failed to  
473 activate *etv5b* despite close proximity to sensory epithelia, a known Fgf-source. Clearly wild  
474 type cells retain the ability to perform glycolysis, but since upregulation of *pgk1* in the otic  
475 vesicle is limited to sensory epithelia and mature SAG neurons (Fig. 4A-G), other otic cells may  
476 be unable to generate sufficient lactate to augment Fgf signaling. This raises the interesting  
477 possibility that Fgf and lactate must be co-secreted from signaling sources to support full  
478 signaling potential.

479

#### 480 **Regulation of Pgk1 by Pgk1-alt.**

481 The *sagd1* mutation does not directly affect full length Pgk1, but instead disrupts a novel  
482 transcript arising from an independent downstream transcription start site that appears to reflect  
483 an ancient transposon insertion. The first 30 amino acids of Pgk1-alt are novel but downstream

484 the sequence is identical to exons 2-6 of P<sub>gk1</sub>-FL. Production of P<sub>gk1</sub>-alt is necessary and  
485 sufficient for upregulation of *pgkl-FL*, possibly involving transcript stabilization. Exon 6 of  
486 zebrafish P<sub>gk1</sub>-FL and P<sub>gk1</sub>-alt corresponds closely to the STE (stabilizing element) of yeast  
487 P<sub>gk1</sub> (Ruiz-Echevarria et al., 2001). Premature stops within the first half of yeast *Pgkl* lead to  
488 nonsense-mediated decay (NMD) of the transcript, but later stops (occurring downstream of the  
489 STE) do not trigger NMD (Hagan et al., 1995). The STE can also stabilize recombinant  
490 transcripts containing foreign sequences that including a 3'UTR that normally destabilizes the  
491 transcript independent of NMD. In each case the STE must be translated in order to function,  
492 raising the possibility that the corresponding peptide is required for stability (Ruiz-Echevarria et  
493 al., 2001). Several recent studies have identified full length P<sub>gk1</sub> in yeast and human as an  
494 unconventional mRNA-binding protein (Beckmann et al., 2015; Liao et al., 2016), and human  
495 P<sub>gk1</sub> can bind specific mRNAs to affect stability, though often by destabilization (Ho et al.,  
496 2010; Shetty et al., 2004). Whether P<sub>gk1</sub> increases or decreases mRNA stability could reflect  
497 interactions with specific sequences or secondary structures in the target. In any case, it seems  
498 reasonable that the STE of P<sub>gk1</sub>-alt has been coopted from an established “moonlighting”  
499 function of P<sub>gk1</sub> to locally upregulate *pgkl-FL* by increasing transcript by stability, thereby  
500 facilitating the switch to Warburg metabolism.

501 Despite the requirement for *pgkl-alt* in the developing nervous system, it is not required in  
502 mesodermal tissues. For example, upregulation of *pgkl* in developing somites is not affected in  
503 *sagdl*<sup>-/-</sup> mutants. Curiously, *pgkl* is not appreciably upregulated in presomitic mesoderm,  
504 despite the fact that somitogenesis involves a gradient aerobic glycolysis and lactate synthesis  
505 that is highest in the tail and declines anteriorly (Bulusu et al., 2017; Oginuma et al., 2017;  
506 Özbudak et al., 2010). However, establishment of Warburg-like metabolism does not  
507 necessarily require elevated *pgkl*. Conversely, elevated *pgkl* does not necessarily indicate a  
508 Warburg-like state. Indeed, upregulation of *pgkl* in somites likely provides high levels of  
509 pyruvate to favor robust mitochondrial ATP synthesis over lactate synthesis (Özbudak et al.,  
510 2010).

511           Although the *sagd1* mutation was recovered in a forward ENU mutagenesis screen, we note  
512 that the SNPs detected in the *pgkl-alt* sequence were previously reported in the genome  
513 sequence database. It is therefore likely that familial breeding during our screen allowed  
514 generation and detection of homozygous carriers of this preexisting allele. Indeed, we have  
515 subsequently detected these SNPs in our wild-type stock, likely accounting for variation in  
516 expression levels in early otic genes sometimes detected in specific families. As a cautionary  
517 note, the sequence for *pgkl-alt* was initially represented in older versions of the annotated  
518 zebrafish genome but has since been removed, presumably deemed a technical artifact. Had we  
519 used more recent versions of the genome as our reference dataset, the SNPs in *sagd1* would have  
520 been overlooked. Regardless of its origins, identification of the *sagd1* mutant allele  
521 underscores the continuing utility of forward screens: Had we not recovered *sagd1* from our  
522 screen, it is highly unlikely that we would have identified *pgkl* as a developmental regulatory  
523 gene.

524

525

526

527

528

529

530

531

532

533

534

535

536

537



## 538 MATERIALS AND METHODS

### 539 Fish strains and developmental conditions

540 Wild-type embryos were derived from the AB line (Eugene,OR). For most experiments  
541 embryos were maintained at 28.5°C, except where noted. Embryos were staged according to  
542 standard protocols (Kimmel et al., 1995). PTU (1-phenyl 2-thiourea), 0.3 mg/ml (Sigma  
543 P7629) was included in the fish water to inhibit pigment formation. The following transgenic  
544 lines were used in this study: Tg(*hsp70:fgf8a*)<sup>x17</sup> (Millimaki et al., 2010),  
545 Tg(*Brn3c:GAP43-GFP*)<sup>s356t</sup> (Xiao et al., 2005), Tg(-17.6*isl2b:GFP*)<sup>zc7</sup> (Pittman et al., 2008),  
546 Tg(*hsp70I:dnfgfr1-EGFP*)<sup>pd1</sup> (Lee et al., 2005), and new lines generated for this study  
547 Tg(*hsp70I:pgk1-FL*)<sup>x65</sup> and Tg(*hsp70I:pgk1-alt*)<sup>x66</sup>. These transgenic lines are herein referred to  
548 as *hs:fgf8*, *brn3c:GFP*, *Isl2b:GFP*, *hs:pgk1-FL*, *hs:pgk1-alt*, and *hs:dnfgfr1* respectively.  
549 Mutant lines *sagd1*<sup>x40</sup> and *pgk1*<sup>x55</sup> were used for loss of function analysis. Homozygous  
550 *sagd1*<sup>-/-</sup> and *pgk1*<sup>-/-</sup> mutants were identified by a characteristic decrease in the expression of  
551 *Isl2b-Gfp* or *brnc3:Gfp*, or by PCR amplification of *pgk1* DNA using the following primers:  
552 Forward primer 1, 5'-AGCAAGTACATCCAATTGCCG-3'; Forward primer 2,  
553 5'-AAGGAAAGCGGTGATCATGT-3'; Reverse primer,  
554 5'-GGAAGTGTATCTGTCACGCGT-3'. Forward primer 1 produces an amplicon of ~451 bp  
555 from both wild-type and mutant DNA, whereas forward primer 2 produces an amplicon of 236  
556 bp from wild-type DNA only.

557

### 558 Gene misexpression and morpholino injections

559 Heat-shock regimens were carried in a water bath at indicated temperatures and durations.  
560 Embryos were kept in a 33°C incubator after the heat-shock. Transgenic carriers were  
561 identified by morphological characteristics. Knockdown of Plasminogen was performed by  
562 injecting one-cell stage embryos with ~5 ng of morpholino oligomer with the following  
563 sequence: 5'-AACTGCTTTGTGTACCTCCATGTCG-3'.

564

## 565 **In situ hybridization and immunohistochemistry**

566 Whole mount in situ hybridization and immunohistochemistry protocols used in this study were  
567 previously described (Phillips et al., 2001). Whole mount stained embryos were cut into 10  $\mu$ m  
568 thick sections using a cryostat as previously described (Vemaraju et al., 2012). The following  
569 antibodies were used in this study: Anti-Islet1/2 (Developmental Studies Hybridoma Bank  
570 39.4D5, 1:100), Anti-GFP (Invitrogen A11122, 1:250), Alexa 546 goat anti-mouse or anti-rabbit  
571 IgG (ThermoFisher Scientific A-11003/A-11010, 1:50). Promega terminal deoxynucleotidyl  
572 transferase (M1871) was used according to manufacturer's protocol to perform the TUNEL  
573 assay.

574

## 575 **Cell Transplantation**

576 Wild-type donor embryos were injected with a lineage tracer (tetramethylrhodamine labeled,  
577 10,000 MW, lysine-fixable dextran in 0.2 M KCl) at one-cell stage and transplanted into  
578 non-labeled wild-type or *pgkl* mutant embryos at the blastula stage. A total of 151 and 247  
579 transplanted wild type cells were visualized in the ears of wild-type embryos and *pgkl* mutants,  
580 respectively, (n= 8 otic vesicles each) and analyzed for the expression of *etv5b*.

581

## 582 **Pharmacological treatments**

583 The pharmacological inhibitors used in this study include Hexokinase inhibitor 2DG  
584 (2-Deoxy-Glucose, Sigma D8375), PFKFB3 inhibitor 3PO (Sigma SML1343), Pyruvate  
585 Dehydrogenase Kinase inhibitor DCA (dichloroacetate, Sigma 347795), Lactate Dehydrogenase  
586 inhibitor Galloflavin (Sigma SML0776), MCT1/2/4 inhibitors CHC  
587 ( $\alpha$ -cyano-4-hydroxycinnamic acid, Sigma C2020) and UK-5099 (Sigma PZ0160), MEK inhibitor  
588 U1026 (Sigma U120) and PI3K inhibitor LY294002 (Sigma L9908). All inhibitors were  
589 dissolved in a 10 mM DMSO stock solution and diluted into the final indicated concentrations in  
590 fish water. Lactate treatments were performed with a 60% stock sodium DL-lactate solution  
591 (Sigma L1375) diluted 1 to 1000 in fish water to a final concentration of 6.7 mM, and buffered

592 with 10 mm MES at pH 6.2. Note, lactate treatment has little effect on embryonic development  
593 at higher pH (not shown). Treatments were carried in a 24-well plate with a maximum of 15  
594 embryos per well in a volume of 500  $\mu$ l each.

595

## 596 **Statistics**

597 Student's t-test was used for pairwise comparisons. Analysis of 3 or more samples was  
598 performed by one-way ANOVA and Tukey post-hoc HSD test. Sufficiency of sample sizes  
599 was based on estimates of confidence limits. Depending on genotype and probe, 2-8 embryos  
600 were utilized for the analysis of gene expression in serial sections; and 7-40 embryos were used  
601 for counts of *Isl1/2+* SAG neurons or *brn3c: GFP+* hair cells in whole mount specimens.

602

## 603 **Whole Genome Sequencing and Mapping Analysis**

604 Adult zebrafish males derived from the AB line were mutagenized using the alkylating agent  
605 N-ethyl-N-nitrosourea (ENU) and outcrossed to *Isl2b: GFP+* females as previously described  
606 (Riley and Grunwald, 1995). *sagd1* mutants were identified in the screening process due to the  
607 decreased expression of *Isl2b:Gfp* in vestibular SAG neurons. For the mapping analysis, *sagd1*  
608 mutants were outcrossed to the highly polymorphic zebrafish WIK line. A genomic pool of 50  
609 homozygous mutants were collected from the intercrosses between 3 pairs of heterozygous  
610 *sagd1* carriers of the AB/WIK hybrid line and sent for whole genome sequencing at Genomic  
611 Sequencing and Analysis Facility (GSAF) at the University of Texas-Austin. Sequence reads  
612 were aligned using the BWA alignment software. Bulk segregant linkage and homozygosity  
613 mapping of the aligned sequences were performed using Megamapper (Obholzer et al., 2012).  
614 Both approaches identified the *pgkl* locus as the top candidate lesion in *sagd1* mutants.

615

## 616 **ACKNOWLEDGEMENTS**

617 We thank Sarah Ferguson for her help in processing whole genome sequence data. This work  
618 was funded by NIH-NIDCD grant R01-DC03806.

619

620 **REFERENCES**

- 621 Aït-Ali, N., Fridlich, R., Millet-Puel, G., Clérin, E., Delalande, F., Jaillard, C., Blond, F.,  
622 Perrocheau, L., Reichman, S., Byrne, Leah C., Olivier-Bandini, A., Bellalou, J., Moyses,  
623 E., Bouillaud, F., Nicol, X., Dalkara, D., van Dorsselaer, A., Sahel, J.-A., Léveillard, T.,  
624 2015. Rod-Derived Cone Viability Factor Promotes Cone Survival by Stimulating  
625 Aerobic Glycolysis. *Cell*. 161, 817-832.
- 626 Abello, G., Khatri, S., Radosevic, M., Scotting, P. J., Giraldez, F., Alsina, B., 2010. Independent  
627 regulation of Sox3 and Lmx1b by FGF and BMP signaling influences the neurogenic  
628 and non-neurogenic domains in the chick otic placode. *Dev Biol*. 339, 166-78.
- 629 Agathocleous, M., Love, N. K., Randlett, O., Harris, J. J., Liu, J., Murray, A. J., Harris, W. A.,  
630 2012. Metabolic differentiation in the embryonic retina. *Nature Cell Biology*. 14, 859.
- 631 Alsina, B., Abelló, G., Ulloa, E., Henrique, D., Pujades, C., Giraldez, F., 2004. FGF signaling is  
632 required for determination of otic neuroblasts in the chick embryo. *Developmental*  
633 *Biology*. 267, 119-134.
- 634 Andermann, P., Ungos, J., Raible, D. W., 2002. Neurogenin1 defines zebrafish cranial sensory  
635 ganglia precursors. *Developmental Biology*. 251, 45-58.
- 636 Beckmann, B. M., Horos, R., Fischer, B., Castello, A., Eichelbaum, K., Alleaume, A.-M.,  
637 Schwarzl, T., Curk, T., Foehr, S., Huber, W., Krijgsveld, J., Hentze, M. W., 2015. The  
638 RNA-binding proteomes from yeast to man harbour conserved enigmRBPs. *Nature*  
639 *Communications*. 6, 10127.
- 640 Bermingham-McDonogh, O., Stone, J. S., Reh, T. A., Rubel, E. W., 2001. FGFR3 Expression  
641 during Development and Regeneration of the Chick Inner Ear Sensory Epithelia.  
642 *Developmental Biology*. 238, 247-259.
- 643 Bermingham, N. A., Hassan, B. A., Price, S. D., Vollrath, M. A., Ben-Arie, N., Eatock, R. A.,  
644 Bellen, H. J., Lysakowski, A., Zoghbi, H. Y., 1999. *Math1*: An Essential Gene for the  
645 Generation of Inner Ear Hair Cells. *Science*. 284, 1837-1841.

- 646 Botta, A., Delteil, F., Mettouchi, A., Vieira, A., Estrach, S., Négroni, L., Stefani, C., Lemichez,  
647 E., Meneguzzi, G., Gagnoux-Palacios, L., 2012. Confluence switch signaling regulates  
648 ECM composition and the plasmin proteolytic cascade in keratinocytes. *Journal of Cell*  
649 *Science*. 125, 4241-4252.
- 650 Brown, L. A., Amores, A., Schilling, T. F., Jowett, T., Baert, J. L., de Launoit, Y., Sharrocks, A.  
651 D., 1998. Molecular characterization of the zebrafish PEA3 ETS-domain transcription  
652 factor. *Oncogene*. 17, 93-104.
- 653 Bulusu, V., Prior, N., Snaebjornsson, M. T., Kuehne, A., Sonnen, K. F., Kress, J., Stein, F.,  
654 Schultz, C., Sauer, U., Aulehla, A., 2017. Spatiotemporal Analysis of a Glycolytic  
655 Activity Gradient Linked to Mouse Embryo Mesoderm Development. *Dev Cell*. 40,  
656 331-341.e4.
- 657 Cairns, R. A., Harris, I. S., Mak, T. W., 2011. Regulation of cancer cell metabolism. *Nature*  
658 *Reviews Cancer*. 11, 85.
- 659 Chen, P., Johnson, J. E., Zoghbi, H. Y., Segil, N., 2002. The role of Math1 in inner ear  
660 development: Uncoupling the establishment of the sensory primordium from hair cell  
661 fate determination. *Development*. 129, 2495-2505.
- 662 Chirico, W. J., 2011. Protein release through nonlethal oncotic pores as an alternative  
663 nonclassical secretory pathway. *BMC Cell Biology*. 12, 46.
- 664 Clem, B., Telang, S., Clem, A., Yalcin, A., Meier, J., Simmons, A., Rasku, M. A., Arumugam, S.,  
665 Dean, W. L., Eaton, J., Lane, A., Trent, J. O., Chesney, J., 2008. Small-molecule  
666 inhibition of 6-phosphofructo-2-kinase activity suppresses glycolytic flux and tumor  
667 growth. *Molecular Cancer Therapeutics*. 7, 110-120.
- 668 Esen, E., Chen, J., Karner, Courtney M., Okunade, Adewole L., Patterson, Bruce W., Long, F.,  
669 2013. WNT-LRP5 Signaling Induces Warburg Effect through mTORC2 Activation  
670 during Osteoblast Differentiation. *Cell Metabolism*. 17, 745-755.
- 671 Farabegoli, F., Vettraino, M., Manerba, M., Fiume, L., Roberti, M., Di Stefano, G., 2012.  
672 Galloflavin, a new lactate dehydrogenase inhibitor, induces the death of human breast

- 673 cancer cells with different glycolytic attitude by affecting distinct signaling pathways.  
674 European Journal of Pharmaceutical Sciences. 47, 729-738.
- 675 George, S. J., Johnson, J. L., Smith, M. A., Jackson, C. L., 2001. Plasmin-Mediated Fibroblast  
676 Growth Factor-2 Mobilisation Supports Smooth Muscle Cell Proliferation in Human  
677 Saphenous Vein. Journal of Vascular Research. 38, 492-501.
- 678 Gou, Y., Vemaraju, S., Sweet, E. M., Kwon, H.-J., Riley, B. B., 2018. *sox2* and *sox3* Play unique  
679 roles in development of hair cells and neurons in the zebrafish inner ear. Developmental  
680 Biology. 435, 73-83.
- 681 Gu, W., Gaeta, X., Sahakyan, A., Chan, Alanna B., Hong, Candice S., Kim, R., Braas, D., Plath,  
682 K., Lowry, William E., Christofk, Heather R., 2016. Glycolytic Metabolism Plays a  
683 Functional Role in Regulating Human Pluripotent Stem Cell State. Cell Stem Cell. 19,  
684 476-490.
- 685 Hagan, K. W., Ruiz-Echevarria, M. J., Quan, Y., Peltz, S. W., 1995. Characterization of  
686 cis-acting sequences and decay intermediates involved in nonsense-mediated mRNA  
687 turnover. Mol Cell Biol. 15, 809-23.
- 688 Halestrap, A. P., 1975. The mitochondrial pyruvate carrier. Kinetics and specificity for substrates  
689 and inhibitors. Biochem J. 148, 85-96.
- 690 Halestrap, A. P., Denton, R. M., 1974. Specific inhibition of pyruvate transport in rat liver  
691 mitochondria and human erythrocytes by alpha-cyano-4-hydroxycinnamate. Biochem J.  
692 138, 313-6.
- 693 Hawkins, T. A., Cavodeassi, F., Erdélyi, F., Szabó, G., Lele, Z., 2008. The small molecule  
694 Mek1/2 inhibitor U0126 disrupts the chordamesoderm to notochord transition in  
695 zebrafish. BMC Dev Biol. 8, 42.
- 696 Hayashi, T., Cunningham, D., Bermingham-McDonogh, O., 2007. Loss of *Fgfr3* leads to excess  
697 hair cell development in the mouse organ of Corti. Developmental Dynamics. 236,  
698 525-533.

- 699 Hayashi, T., Ray, C. A., Bermingham-McDonogh, O., 2008. *Fgf20* Is Required for Sensory  
700 Epithelial Specification in the Developing Cochlea. *The Journal of Neuroscience*. 28,  
701 5991-5999.
- 702 Ho, M.-Y., Tang, S.-J., Ng, W. V., Yang, W., Leu, S.-J. J., Lin, Y.-C., Feng, C.-K., Sung, J.-S.,  
703 Sun, K.-H., 2010. Nucleotide-binding domain of phosphoglycerate kinase 1 reduces  
704 tumor growth by suppressing COX-2 expression. *Cancer Science*. 101, 2411-2416.
- 705 Jacques, B. E., Montcouquiol, M. E., Layman, E. M., Lewandoski, M., Kelley, M. W., 2007.  
706 *Fgf8* induces pillar cell fate and regulates cellular patterning in the mammalian cochlea.  
707 *Development*. 134, 3021-3029.
- 708 Jiang, L., Romero-Carvajal, A., Haug, J. S., Seidel, C. W., Piotrowski, T., 2014.  
709 Gene-expression analysis of hair cell regeneration in the zebrafish lateral line.  
710 *Proceedings of the National Academy of Sciences*. 111, E1383-E1392.
- 711 Jung, Y., Shiozawa, Y., Wang, J., Wang, J., Wang, Z., Pedersen, E. A., Lee, C. H., Hall, C. L.,  
712 Hogg, P. J., Krebsbach, P. H., Keller, E. T., Taichman, R. S., 2009. Expression of PGK1  
713 by Prostate Cancer Cells Induces Bone Formation. *Molecular Cancer Research*. 7,  
714 1595-1604.
- 715 Kantarci, H., Edlund, R. K., Groves, A. K., Riley, B. B., 2015. *Tfap2a* Promotes Specification  
716 and Maturation of Neurons in the Inner Ear through Modulation of Bmp, Fgf and Notch  
717 Signaling. *PLoS Genetics*. 11, e1005037.
- 718 Kantarci, H., Gerberding, A., Riley, B. B., 2016. Spemann organizer gene *Gooseoid* promotes  
719 delamination of neuroblasts from the otic vesicle. *Proceedings of the National Academy*  
720 *of Sciences*. 113, E6840-E6848.
- 721 Kato, M., Li, J., Chuang, J. L., Chuang, D. T., 2007. Distinct Structural Mechanisms for  
722 Inhibition of Pyruvate Dehydrogenase Kinase Isoforms by AZD7545, Dichloroacetate,  
723 and Radicol. *Structure*. 15, 992-1004.
- 724 Kimmel, C. B., Ballard, W. W., Kimmel, S. R., Ullmann, B., Schilling, T. F., 1995. Stages of  
725 embryonic development of the zebrafish. *Dev Dyn*. 203, 253-310.

- 726 Korzh, V., Sleptsova, I., Liao, J., He, J., Gong, Z., 1998. Expression of zebrafish bHLH genes  
727 *ngn1* and *nrd* defines distinct stages of neural differentiation. *Dev Dyn.* 213, 92-104.
- 728 Ku, Y.-C., Renaud, N. A., Veile, R. A., Helms, C., Voelker, C. C. J., Warchol, M. E., Lovett, M.,  
729 2014. The Transcriptome of Utricle Hair Cell Regeneration in the Avian Inner Ear. *The*  
730 *Journal of Neuroscience.* 34, 3523-3535.
- 731 Lassiter, R. N., Reynolds, S. B., Marin, K. D., Mayo, T. F., Stark, M. R., 2009. FGF signaling is  
732 essential for ophthalmic trigeminal placode cell delamination and differentiation. *Dev*  
733 *Dyn.* 238, 1073-82.
- 734 Lay, A. J., Jiang, X.-M., Kisker, O., Flynn, E., Underwood, A., Condrón, R., Hogg, P. J., 2000.  
735 Phosphoglycerate kinase acts in tumour angiogenesis as a disulphide reductase. *Nature.*  
736 408, 869.
- 737 Lee, Dong C., Sohn, Hyun A., Park, Z.-Y., Oh, S., Kang, Yun K., Lee, K.-m., Kang, M., Jang,  
738 Ye J., Yang, S.-J., Hong, Young K., Noh, H., Kim, J.-A., Kim, Dong J., Bae, K.-H.,  
739 Kim, Dong M., Chung, Sang J., Yoo, Hyang S., Yu, D.-Y., Park, Kyung C., Yeom,  
740 Young I., 2015. A Lactate-Induced Response to Hypoxia. *Cell.* 161, 595-609.
- 741 Lee, Y., Grill, S., Sanchez, A., Murphy-Ryan, M., Poss, K. D., 2005. Fgf signaling instructs  
742 position-dependent growth rate during zebrafish fin regeneration. *Development.* 132,  
743 5173-5183.
- 744 Liao, Y., Castello, A., Fischer, B., Leicht, S., Föehr, S., Frese, Christian K., Ragan, C.,  
745 Kurscheid, S., Pagler, E., Yang, H., Krijgsveld, J., Hentze, Matthias W., Preiss, T., 2016.  
746 The Cardiomyocyte RNA-Binding Proteome: Links to Intermediary Metabolism and  
747 Heart Disease. *Cell Reports.* 16, 1456-1469.
- 748 Liberti, M. V., Locasale, J. W., 2016. The Warburg Effect: How Does it Benefit Cancer Cells?  
749 *Trends in Biochemical Sciences.* 41, 211-218.
- 750 Ma, Q., Chen, Z., Barrantes, I. d. B., Luis de la Pompa, J., Anderson, D. J., 1998. *neurogenin1* Is  
751 Essential for the Determination of Neuronal Precursors for Proximal Cranial Sensory  
752 Ganglia. *Neuron.* 20, 469-482.



- 753 Magarinos, M., Aburto, M. R., Sanchez-Calderon, H., Munoz-Agudo, C., Rapp, U. R.,  
754 Varela-Nieto, I., 2010. RAF kinase activity regulates neuroepithelial cell proliferation  
755 and neuronal progenitor cell differentiation during early inner ear development. *PLoS*  
756 *One.* 5, e14435.
- 757 Maier, E. C., Whitfield, T. T., 2014. RA and FGF Signalling Are Required in the Zebrafish Otic  
758 Vesicle to Pattern and Maintain Ventral Otic Identities. *PLoS Genetics.* 10, e1004858.
- 759 Manerba, M., Vettrano, M., Fiume, L., Di Stefano, G., Sartini, A., Giacomini, E., Buonfiglio, R.,  
760 Roberti, M., Recanatini, M., 2012. Galloflavin (CAS 568-80-9): a novel inhibitor of  
761 lactate dehydrogenase. *ChemMedChem.* 7, 311-7.
- 762 Mansour, S. L., Goddard, J. M., Capecchi, M. R., 1993. Mice homozygous for a targeted  
763 disruption of the proto-oncogene *int-2* have developmental defects in the tail and inner  
764 ear. *Development.* 117, 13-28.
- 765 Mansour, S. L., Twigg, S. R. F., Freeland, R. M., Wall, S. A., Li, C., Wilkie, A. O. M., 2009.  
766 Hearing loss in a mouse model of Muenke syndrome. *Hum Mol Genet.* 18, 43-50.
- 767 Maulding, K., Padanad, M. S., Dong, J., Riley, B. B., 2014. Mesodermal *Fgf10b* cooperates with  
768 other fibroblast growth factors during induction of otic and epibranchial placodes in  
769 zebrafish. *Dev Dyn.* 243, 1275-85.
- 770 Meddahi, A., Lemdjabar, H., Caruelle, J. P., Barritault, D., Hornebeck, W., 1995. Inhibition by  
771 dextran derivatives of FGF-2 plasmin-mediated degradation. *Biochimie.* 77, 703-706.
- 772 Menendez-Montes, I., Escobar, B., Palacios, B., Gómez, M. J., Izquierdo-Garcia, J. L., Flores, L.,  
773 Jiménez-Borreguero, L. J., Aragones, J., Ruiz-Cabello, J., Torres, M., Martin-Puig, S.,  
774 2016. Myocardial VHL-HIF Signaling Controls an Embryonic Metabolic Switch  
775 Essential for Cardiac Maturation. *Dev Cell.* 39, 724-739.
- 776 Millimaki, B. B., Sweet, E. M., Dhasan, M. S., Riley, B. B., 2007. Zebrafish *atoh1* genes: classic  
777 proneural activity in the inner ear and regulation by Fgf and Notch. *Development.* 134,  
778 295-305.

- 779 Millimaki, B. B., Sweet, E. M., Riley, B. B., 2010. Sox2 is required for maintenance and  
780 regeneration, but not initial development, of hair cells in the zebrafish inner ear. *Dev*  
781 *Biol.* 338, 262-9.
- 782 Montero, J.-A., Kilian, B., Chan, J., Bayliss, P. E., Heisenberg, C.-P., 2003. Phosphoinositide  
783 3-Kinase Is Required for Process Outgrowth and Cell Polarization of Gastrulating  
784 Mesendodermal Cells. *Current Biology.* 13, 1279-1289.
- 785 Nechiporuk, A., Linbo, T., Raible, D. W., 2005. Endoderm-derived Fgf3 is necessary and  
786 sufficient for inducing neurogenesis in the epibranchial placodes in zebrafish.  
787 *Development.* 132, 3717-3730.
- 788 Nirenberg, M. W., Hogg, J. F., 1958. Inhibition of Anaerobic Glycolysis in Ehrlich Ascites  
789 Tumor Cells by 2-Deoxy-D-Glucose. *Cancer Research.* 18, 518-521.
- 790 O'Hagan, R. C., Tozer, R. G., Symons, M., McCormick, F., Hassell, J. A., 1996. The activity of  
791 the Ets transcription factor PEA3 is regulated by two distinct MAPK cascades.  
792 *Oncogene.* 13, 1323-1333.
- 793 Obholzer, N., Swinburne, I. A., Schwab, E., Nechiporuk, A. V., Nicolson, T., Megason, S. G.,  
794 2012. Rapid positional cloning of zebrafish mutations by linkage and homozygosity  
795 mapping using whole-genome sequencing. *Development.* 139, 4280-4290.
- 796 Oginuma, M., Moncuquet, P., Xiong, F., Karoly, E., Chal, J., Guevorkian, K., Pourquié, O., 2017.  
797 A Gradient of Glycolytic Activity Coordinates FGF and Wnt Signaling during  
798 Elongation of the Body Axis in Amniote Embryos. *Dev Cell.* 40, 342-353.e10.
- 799 Ono, K., Kita, T., Sato, S., O'Neill, P., Mak, S.-S., Paschaki, M., Ito, M., Gotoh, N., Kawakami,  
800 K., Sasai, Y., Ladher, R. K., 2014. FGFR1-Frs2/3 Signalling Maintains Sensory  
801 Progenitors during Inner Ear Hair Cell Formation. *PLoS Genetics.* 10, e1004118.
- 802 Özbudak, E. M., Tassy, O., Pourquié, O., 2010. Spatiotemporal compartmentalization of key  
803 physiological processes during muscle precursor differentiation. *Proceedings of the*  
804 *National Academy of Sciences.* 107, 4224-4229.

- 805 Peng, M., Yin, N., Chhangawala, S., Xu, K., Leslie, C. S., Li, M. O., 2016. Aerobic glycolysis  
806 promotes T helper 1 cell differentiation through an epigenetic mechanism. *Science*. 354,  
807 481-484.
- 808 Phillips, B. T., Bolding, K., Riley, B. B., 2001. Zebrafish *fgf3* and *fgf8* encode redundant  
809 functions required for otic placode induction. *Dev Biol*. 235, 351-65.
- 810 Philp, A., Macdonald, A. L., Watt, P. W., 2005. Lactate – a signal coordinating cell and systemic  
811 function. *Journal of Experimental Biology*. 208, 4561-4575.
- 812 Pirvola, U., Spencer-Dene, B., Xing-Qun, L., Kettunen, P., Thesleff, I., Fritzscht, B., Dickson, C.,  
813 Ylikoski, J., 2000. FGF/FGFR-2(IIIb) Signaling Is Essential for Inner Ear  
814 Morphogenesis. *The Journal of Neuroscience*. 20, 6125-6134.
- 815 Pirvola, U., Ylikoski, J., Trokovic, R., Hébert, J. M., McConnell, S. K., Partanen, J., 2002.  
816 FGFR1 Is Required for the Development of the Auditory Sensory Epithelium. *Neuron*.  
817 35, 671-680.
- 818 Pittman, A. J., Law, M. Y., Chien, C. B., 2008. Pathfinding in a large vertebrate axon tract:  
819 isotopic interactions guide retinotectal axons at multiple choice points. *Development*.  
820 135, 2865-71.
- 821 Puligilla, C., Feng, F., Ishikawa, K., Bertuzzi, S., Dabdoub, A., Griffith, A. J., Fritzscht, B.,  
822 Kelley, M. W., 2007. Disruption of *fibroblast growth factor receptor 3* signaling results  
823 in defects in cellular differentiation, neuronal patterning, and hearing impairment.  
824 *Developmental Dynamics*. 236, 1905-1917.
- 825 Raft, S., Koundakjian, E. J., Quinones, H., Jayasena, C. S., Goodrich, L. V., Johnson, J. E., Segil,  
826 N., Groves, A. K., 2007. Cross-regulation of *Ngn1* and *Math1* coordinates the  
827 production of neurons and sensory hair cells during inner ear development.  
828 *Development*. 134, 4405-15.
- 829 Raible, F., Brand, M., 2001. Tight transcriptional control of the ETS domain factors *Erm* and  
830 *Pea3* by *Fgf* signaling during early zebrafish development. *Mech Dev*. 107, 105-117.

- 831 Riley, B. B., Grunwald, D. J., 1995. Efficient induction of point mutations allowing recovery of  
832 specific locus mutations in zebrafish. *Proc Natl Acad Sci U S A.* 92, 5997-6001.
- 833 Roehl, H., Nüsslein-Volhard, C., 2001. Zebrafish *pea3* and *erm* are general targets of FGF8  
834 signaling. *Current Biology.* 11, 503-507.
- 835 Ruiz-Echevarria, M. J., Munshi, R., Tomback, J., Kinzy, T. G., Peltz, S. W., 2001.  
836 Characterization of a General Stabilizer Element That Blocks Deadenylation-dependent  
837 mRNA Decay. *Journal of Biological Chemistry.* 276, 30995-31003.
- 838 Sá, J. V., Kleiderman, S., Brito, C., Sonnewald, U., Leist, M., Teixeira, A. P., Alves, P. M., 2017.  
839 Quantification of Metabolic Rearrangements During Neural Stem Cells Differentiation  
840 into Astrocytes by Metabolic Flux Analysis. *Neurochem Res.* 42, 244-253.
- 841 San-Millán, I., Brooks, G. A., 2017. Reexamining cancer metabolism: lactate production for  
842 carcinogenesis could be the purpose and explanation of the Warburg Effect.  
843 *Carcinogenesis.* 38, 119-133.
- 844 Schmidt, A., Echtermeyer, F., Alozie, A., Brands, K., Buddecke, E., 2005. Plasmin- and  
845 Thrombin-accelerated Shedding of Syndecan-4 Ectodomain Generates Cleavage Sites at  
846 Lys114–Arg115 and Lys129–Val130 Bonds. *Journal of Biological Chemistry.* 280,  
847 34441-34446.
- 848 Shetty, P., Velusamy, T., Bhandary, Y. P., Liu, M. C., Shetty, S., 2010. Urokinase receptor  
849 expression involves tyrosine phosphorylation of phosphoglycerate kinase. *Mol Cell*  
850 *Biochem.* 335, 235-47.
- 851 Shetty, S., Muniyappa, H., Halady, P. K. S., Idell, S., 2004. Regulation of Urokinase Receptor  
852 Expression by Phosphoglycerate Kinase. *Am J Respir Cell Mol Biol.* 31, 100-106.
- 853 Shim, K., Minowada, G., Coling, D. E., Martin, G. R., 2005. *Sprouty2*, a Mouse Deafness Gene,  
854 Regulates Cell Fate Decisions in the Auditory Sensory Epithelium by Antagonizing  
855 FGF Signaling. *Dev Cell.* 8, 553-564.

- 856 Terriente, J., Gerety, S. S., Watanabe-Asaka, T., Gonzalez-Quevedo, R., Wilkinson, D. G., 2012.  
857 Signalling from hindbrain boundaries regulates neuronal clustering that patterns  
858 neurogenesis. *Development*. 139, 2978-87.
- 859 Tixier, V., Bataillé, L., Etard, C., Jagla, T., Weger, M., DaPonte, J. P., Strähle, U., Dickmeis, T.,  
860 Jagla, K., 2013. Glycolysis supports embryonic muscle growth by promoting myoblast  
861 fusion. *Proceedings of the National Academy of Sciences*. 110, 18982-18987.
- 862 Vemaraju, S., Kantarci, H., Padanad, M. S., Riley, B. B., 2012. A spatial and temporal gradient  
863 of Fgf differentially regulates distinct stages of neural development in the zebrafish  
864 inner ear. *PLoS Genet*. 8, e1003068.
- 865 Wang, J., Wang, J., Dai, J., Jung, Y., Wei, C.-L., Wang, Y., Havens, A. M., Hogg, P. J., Keller,  
866 E. T., Pienta, K. J., Nor, J. E., Wang, C.-Y., Taichman, R. S., 2007. A Glycolytic  
867 Mechanism Regulating an Angiogenic Switch in Prostate Cancer. *Cancer Research*. 67,  
868 149-159.
- 869 Wang, J., Ying, G., Wang, J., Jung, Y., Lu, J., Zhu, J., Pienta, K. J., Taichman, R. S., 2010.  
870 Characterization of Phosphoglycerate Kinase-1 Expression of Stromal Cells Derived  
871 from Tumor Microenvironment in Prostate Cancer Progression. *Cancer Research*. 70,  
872 471-480.
- 873 Wang, Y.-H., Israelsen, William J., Lee, D., Yu, Vionnie W. C., Jeanson, Nathaniel T., Clish,  
874 Clary B., Cantley, Lewis C., Vander Heiden, Matthew G., Scadden, David T., 2014.  
875 Cell-State-Specific Metabolic Dependency in Hematopoiesis and Leukemogenesis. *Cell*.  
876 158, 1309-1323.
- 877 Whitfield, T. T., 2015. Development of the inner ear. *Current Opinion in Genetics &*  
878 *Development*. 32, 112-118.
- 879 Woods, C., Montcouquiol, M., Kelley, M. W., 2004. Math1 regulates development of the  
880 sensory epithelium in the mammalian cochlea. *Nature Neuroscience*. 7, 1310.

- 881 Xiao, T., Roeser, T., Staub, W., Baier, H., 2005. A GFP-based genetic screen reveals mutations  
882 that disrupt the architecture of the zebrafish retinotectal projection. *Development*. 132,  
883 2955-67.
- 884 Yang, J., Ruchti, E., Petit, J.-M., Jourdain, P., Grenningloh, G., Allaman, I., Magistretti, P. J.,  
885 2014. Lactate promotes plasticity gene expression by potentiating NMDA signaling in  
886 neurons. *Proceedings of the National Academy of Sciences*. 111, 12228-12233.
- 887 Zheng, X., Boyer, L., Jin, M., Mertens, J., Kim, Y., Ma, L., Hamm, M., Gage, F. H., Hunter, T.,  
888 2016. Metabolic reprogramming during neuronal differentiation from aerobic glycolysis  
889 to neuronal oxidative phosphorylation. *eLife*. 5, e13374.
- 890 Znosko, W. A., Yu, S., Thomas, K., Molina, G. A., Li, C., Tsang, W., Dawid, I. B., Moon, A. M.,  
891 Tsang, M., 2010. Overlapping functions of Pea3 ETS transcription factors in FGF  
892 signaling during zebrafish development. *Dev Biol*. 342, 11-25.
- 893 Zuo, R.-J., Gu, X.-W., Qi, Q.-R., Wang, T.-S., Zhao, X.-Y., Liu, J.-L., Yang, Z.-M., 2015.  
894 Warburg-like Glycolysis and Lactate Shuttle in Mouse Decidua during Early Pregnancy.  
895 *Journal of Biological Chemistry*. 290, 21280-21291.
